# Supplementary material for: Ni–rGO–zeolite nanocomposite: an efficient heterogeneous catalyst for one-pot synthesis of triazoles in water
Source: Royal Society of Chemistry journal article supplement (doi:10.1039/d1ma00143d), 2021-01-01

## Electronic Supplementary Information (ESI†)

### Ni-rGO-zeolite nanocomposite: An efficient heterogeneous catalyst for one-pot synthesis of triazoles in water†

Prasun Choudhury,<sup>a</sup> Shreyasi Chattopadhyay,<sup>b</sup> Goutam De<sup>\*bc</sup> and Basudeb Basu<sup>\*ad</sup>

<sup>a</sup>*Department of Chemistry, North Bengal University, Darjeeling 734013, India. E-mail: basu\_nbu@hotmail.com*

<sup>b</sup>*CSIR-Central Glass & Ceramics Research Institute, 196, Raja S. C. Mullick Road, Jadavpur, Kolkata 700032, India*

<sup>c</sup>*S. N. Bose National Centre for Basic Sciences, Block – JD, Sector – III, Salt Lake, Kolkata 700106, India. E-mail: g.de@bose.res.in*

<sup>d</sup>*Raiganj University, Raiganj 733134, India*

#### Table of contents

|                                                                                                                   | <i>Page no.</i> |
|-------------------------------------------------------------------------------------------------------------------|-----------------|
| <b>SI-1. Materials and methods</b>                                                                                | <b>2</b>        |
| <b>SI-2. Characterization of Ni-zeolite and Ni-rGO nanocomposites</b>                                             | <b>3</b>        |
| <b>SI-3. Characterization of Ni-rGO-zeolite nanocomposite fresh and after reaction</b>                            | <b>4-5</b>      |
| <b>SI-4. Characterization data of various 1,2,3-triazole derivatives</b>                                          | <b>5-10</b>     |
| <b>Table S1 Comparison of catalytic performance of various Ni, Cu and other transition metal catalysts in AAC</b> | <b>11-13</b>    |
| <b>Table S2 Comparative catalytic performance between Cu<sub>2</sub>O@ARF and Ni-rGO-zeolite</b>                  | <b>14</b>       |
| <b>References</b>                                                                                                 | <b>14-15</b>    |
| <b>SI-5. Scanned copies of <sup>1</sup>H and <sup>13</sup>C NMR spectra of various 1,2,3-triazoles</b>            | <b>16-32</b>    |

## **SI-1. Materials and Methods**

### **SI-1.1. Chemicals**

All reagents were purchased from Sigma–Aldrich and used directly without further purification. NaY zeolite was purchased from Sigma–Aldrich. The solvents were purchased from commercial suppliers and used after distillation. For TLC, Merck plates coated with silica gel 60, F<sub>254</sub> were used. The products were purified by column chromatography on 60–120 mesh silica gel (Merck, India).

### **SI-1.2. Characterization**

FT–IR spectra were recorded in FT–IR 8300 SHIMADZU spectrophotometer. The <sup>1</sup>H & <sup>13</sup>C NMR spectra were recorded at 400 MHz and 100 MHz respectively on Bruker Ascend 400 spectrometer in CDCl<sub>3</sub> and DMSO–d<sub>6</sub>. Splitting patterns of protons were described as s (singlet), d (doublet), dd (doublet of doublet) and m (multiplet). Chemical shifts (δ) were reported in parts per million (ppm) relative to TMS as internal standard. *J* values (coupling constant) were reported in Hz (Hertz). <sup>13</sup>C NMR spectra were recorded with complete proton decoupling (CDCl<sub>3</sub>: δ 77.0 ppm and DMSO–d<sub>6</sub>: 39.5 ppm). Centrifugation was done in REMI R–8C DX centrifuge. Inductively Coupled Plasma Atomic Emission Spectroscopy (ICP–AES) was measured by using SPECTRO analytical instruments GmbH, Germany. The X–ray diffraction studies (PXRD) were done by the Rigaku SmartLab (9 kW) diffractometer using CuKα radiation. Raman spectra of the samples were obtained with Renishaw InVia micro Raman spectroscopy with 514 nm laser source. Scanning Electron Microscopy (SEM) and Electron–Dispersive X–ray Spectroscopy (EDS) were performed using JEOL JSM–IT 100 electron microscope. EDS elemental analysis was done in 3 different areas of the samples, and average values were reported. Transmission electron microscopy (TEM) measurements were carried out using a JEOL JEM–2100F electron microscope. X–ray photoelectron spectroscopic (XPS) measurements were done on a PHI 5000 Versaprobe II XPS system with an Al Kα source and a charge neutralizer at room temperature.

## SI-2. Characterization of Ni-zeolite and Ni-rGO nanocomposites

### SI-2.1. FT-IR spectrum of Ni-rGO

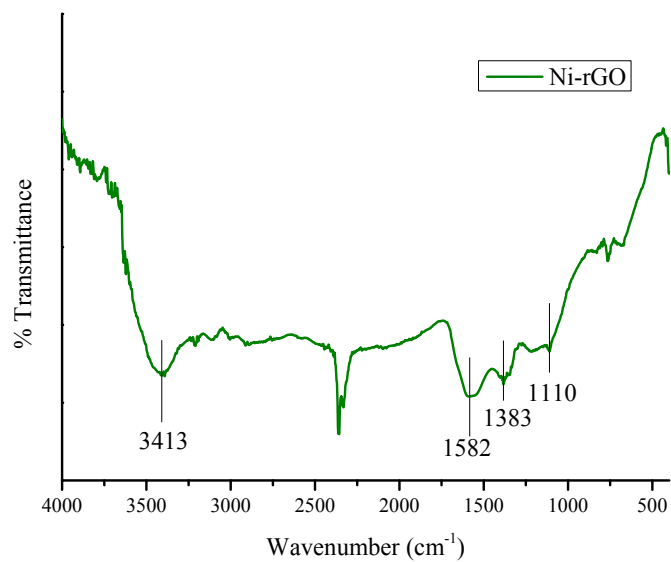

**Fig. S1** FT-IR spectrum of Ni-rGO nanocomposite.

### SI-2.2. FT-IR spectrum of Ni-zeolite

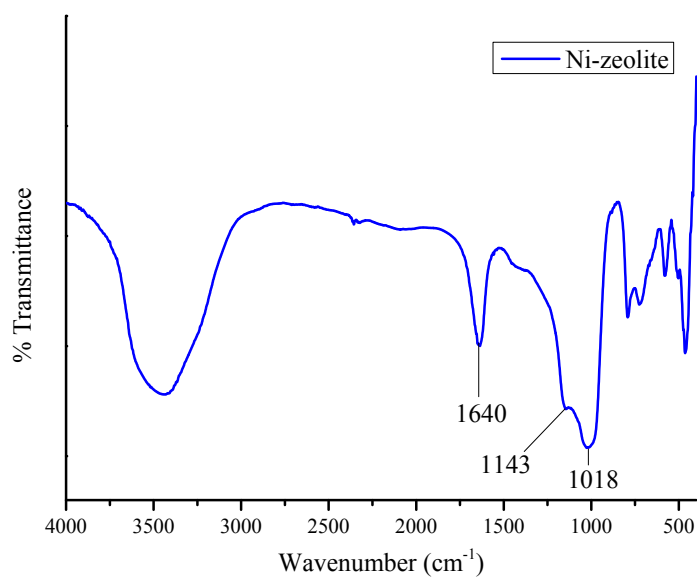

**Fig. S2** FT-IR spectrum of Ni-zeolite nanocomposite.

### SI-3. Characterization of Ni-rGO-zeolite nanocomposite fresh and after reaction

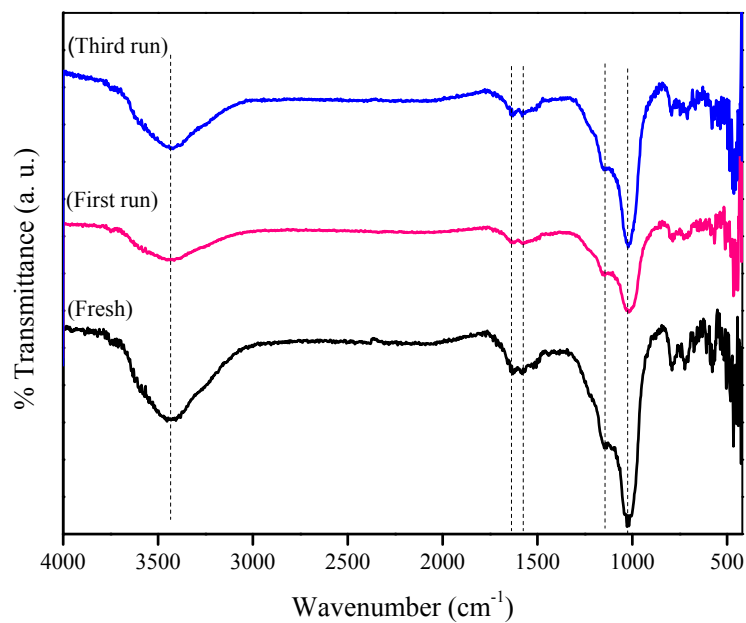

**Fig. S3** FT-IR spectra of Ni-rGO-zeolite nanocomposite of fresh, after first and after third run.

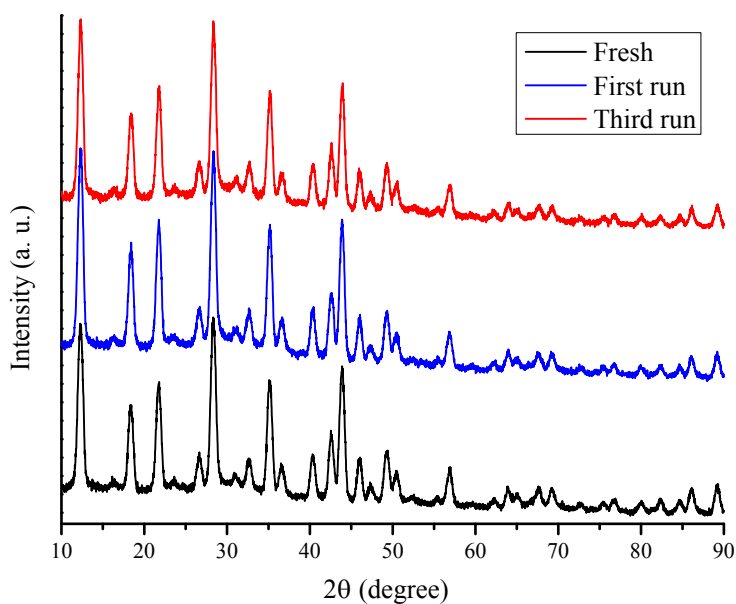

**Fig. S4** XRD patterns of Ni-rGO-zeolite nanocomposite of fresh, after first and after third run.

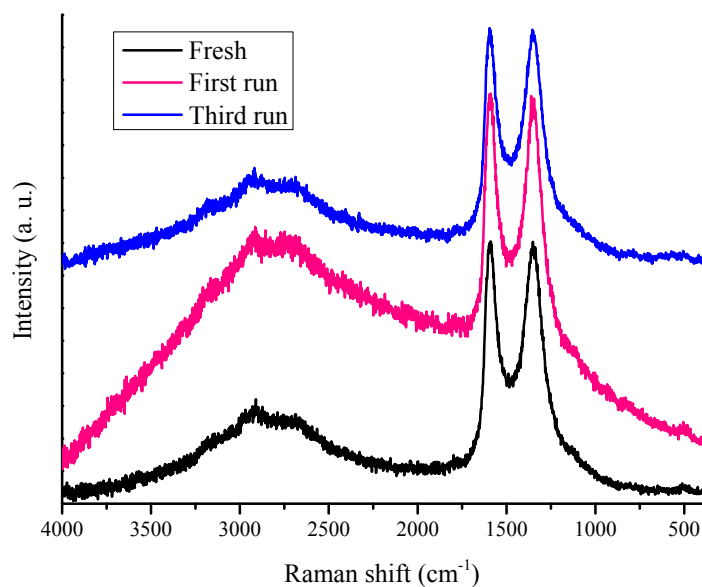

**Fig. S5** Raman spectra of Ni-rGO-zeolite nanocomposite of fresh, after first and after third run.

#### SI-4. Characterization data of various 1,2,3-triazole derivatives listed in Table 2

##### 1-Benzyl-4-phenyl-1*H*-1,2,3-triazole (3a)<sup>1</sup>

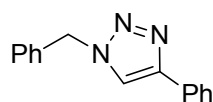

White crystalline solid; m.p.: 128–130 °C (Lit. m.p.: 128–129 °C)<sup>1</sup>; <sup>1</sup>H NMR (400 MHz, CDCl<sub>3</sub>): δ 5.53 (s, 2H), 7.29–7.37 (m, 8H), 7.67 (s, 1H), 7.78–7.79 (m, 2H); <sup>13</sup>C NMR (100 MHz, CDCl<sub>3</sub>): δ 54.2, 119.7, 125.7, 128.0, 128.2, 128.8, 128.9, 129.2, 130.5, 134.7, 148.2.

##### 1-(4-Isopropylbenzyl)-4-phenyl-1*H*-1,2,3-triazole (3b)<sup>2</sup>

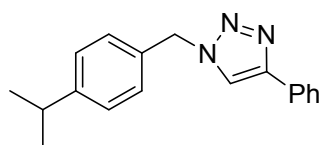

White solid; m.p.: 177–178 °C (Lit. m.p.: 175 °C)<sup>2</sup>; <sup>1</sup>H NMR (400 MHz, CDCl<sub>3</sub>): δ 1.20–1.58 (m, 6H), 2.97–2.99 (m, 1H), 5.52 (s, 2H), 7.00–7.15 (m, 1H), 7.23–7.27 (m, 2H), 7.38–7.42 (m, 2H), 7.65 (m, 3H), 7.73–7.82 (m, 2H); <sup>13</sup>C NMR (100 MHz, CDCl<sub>3</sub>): δ 23.9, 26.2, 33.9, 54.1, 119.4, 125.7, 126.9, 127.29, 128.1, 128.8, 128.9, 129.4, 131.9, 133.1.

### 1-(3-Bromo benzyl)-4-phenyl-1*H*-1,2,3-triazole (3c)<sup>3</sup>

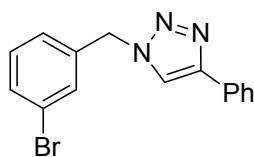

Light yellow solid; m.p.: 92–94 °C (Lit. m.p.: 91–93 °C)<sup>3</sup>; <sup>1</sup>H NMR (400 MHz, CDCl<sub>3</sub>): δ 5.53 (s, 2H), 7.22–7.25 (m, 2H), 7.32 (d, *J* = 7.2 Hz, 1H), 7.38–7.49 (m, 4H), 7.69 (s, 1H), 7.79–7.81 (m, 2H); <sup>13</sup>C NMR (100 MHz, CDCl<sub>3</sub>): δ 53.5, 119.6, 123.1, 125.7, 126.6, 128.3, 128.9, 130.3, 130.7, 131.0, 132.0, 136.9, 148.5.

### 1-(3-Iodo benzyl)-4-phenyl-1*H*-1,2,3-triazole (3d)<sup>4</sup>

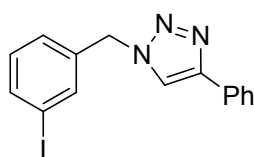

White solid; m.p.: 120–122 °C (Lit. m.p.: 122–124 °C)<sup>4</sup>; <sup>1</sup>H NMR (400 MHz, CDCl<sub>3</sub>): δ 5.50 (s, 2H), 7.10–7.12 (m, 1H), 7.24 (d, *J* = 8 Hz, 2H), 7.32 (d, *J* = 7.2 Hz, 1H), 7.40 (t, *J* = 7.2 Hz, 2H), 7.66–7.70 (m, 3H), 7.79–7.81 (m, 2H); <sup>13</sup>C NMR (100 MHz, CDCl<sub>3</sub>): δ 53.3, 94.8, 119.6, 125.8, 127.2, 128.3, 128.9, 130.4, 130.8, 136.8, 136.9, 137.9, 148.4.

### 1-Cinnamyl-4-phenyl-1*H*-1,2,3-triazole (3e)<sup>5</sup>

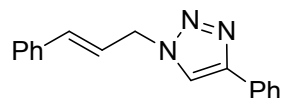

White solid; m.p.: 136–138 °C (Lit. m.p.: 132–134 °C)<sup>5</sup>; <sup>1</sup>H NMR (400 MHz, CDCl<sub>3</sub>): δ 5.15 (dd, *J* = 7.6, 1.2 Hz, 2H), 6.35–6.41 (m, 1H), 6.69 (d, *J* = 16 Hz, 1H), 7.29–7.43 (m, 8H), 7.80–7.84 (m, 3H); <sup>13</sup>C NMR (100 MHz, CDCl<sub>3</sub>): δ 52.4, 119.5, 121.9, 125.7, 126.8, 128.2, 128.6, 128.8, 128.9, 130.6, 135.4, 135.5, 148.1.

### 1-(Naphthalen-1-ylmethyl)-4-phenyl-1*H*-1,2,3-triazole (3f)<sup>6</sup>

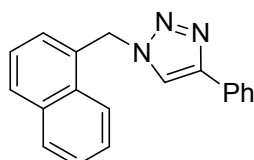

White solid; m.p.: 133–134 °C (Lit. m.p.: 135 °C)<sup>6</sup>; <sup>1</sup>H NMR (400 MHz, CDCl<sub>3</sub>): δ 5.99 (s, 2H), 7.26–7.34 (m, 3H), 7.46–7.72 (m, 5H), 7.90 (s, 2H), 7.99 (s, 2H), 8.0 (s, 1H); <sup>13</sup>C NMR

(100 MHz, CDCl<sub>3</sub>):  $\delta$  52.4, 119.6, 122.9, 125.4, 125.7, 126.5, 127.4, 127.9, 128.1, 128.8, 129.0, 129.9, 130.1, 130.5, 131.2, 134.0, 148.0.

**1-Allyl-4-phenyl-1H-1,2,3-triazole (3g)**<sup>1</sup>

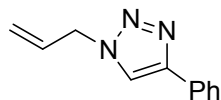

White crystalline solid; m.p.: 62–64 °C (Lit. m.p.: 57–58 °C)<sup>1</sup>; <sup>1</sup>H NMR (400 MHz, CDCl<sub>3</sub>):  $\delta$  4.96 (d,  $J$  = 6 Hz, 2H), 5.26–5.34 (m, 2H), 5.99–6.01 (m, 1H), 7.29–7.31 (m, 1H), 7.36–7.40 (m, 2H), 7.44–7.80 (m, 3H); <sup>13</sup>C NMR (100 MHz, CDCl<sub>3</sub>):  $\delta$  52.7, 119.6, 120.1, 125.7, 128.1, 128.8, 130.6, 131.3, 147.9.

**1-(4-Chlorophenyl)-2-(4-phenyl-1H-1,2,3-triazol-1-yl)ethanone (3h)**<sup>7</sup>

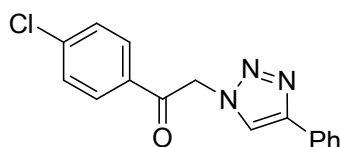

White solid; m.p.: 104–106 °C (Lit. m.p.: 106–109 °C)<sup>7</sup>; <sup>1</sup>H NMR (400 MHz, DMSO-*d*<sub>6</sub>):  $\delta$  6.24 (s, 2H), 7.33 (s, 1H), 7.44 (s, 2H), 7.68–7.69 (m, 2H), 7.85 (s, 2H), 8.08–8.09 (m, 2H), 8.50 (s, 1H); <sup>13</sup>C NMR (100 MHz, DMSO-*d*<sub>6</sub>):  $\delta$  56.5, 123.5, 125.6, 128.4, 129.5, 129.6, 130.6, 131.2, 133.3, 139.7, 146.8, 191.8.

**1-Benzyl-4-(*p*-tolyl)-1H-1,2,3-triazole (3i)**<sup>1</sup>

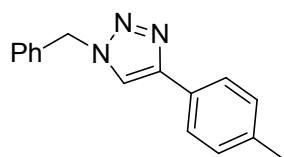

White crystalline solid; m.p.: 152–154 °C (Lit. m.p.: 154–155 °C)<sup>1</sup>; <sup>1</sup>H NMR (400 MHz, CDCl<sub>3</sub>):  $\delta$  2.35 (s, 3H), 5.52 (s, 2H), 7.19 (d,  $J$  = 8 Hz, 2H), 7.27–7.36 (m, 5H), 7.62 (s, 1H), 7.68 (d,  $J$  = 8 Hz, 2H); <sup>13</sup>C NMR (100 MHz, CDCl<sub>3</sub>):  $\delta$  21.3, 54.1, 119.3, 125.6, 127.7, 128.0, 128.7, 129.1, 129.5, 134.8, 138.09, 148.3.

**1-(3-Bromo benzyl)-4-(*p*-tolyl)-1H-1,2,3-triazole (3j)**<sup>6</sup>

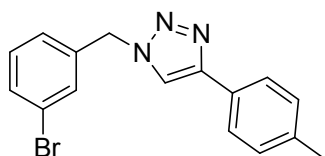

Light yellow solid; m.p.: 132–134 °C (Lit. m.p.: 132–134 °C)<sup>6</sup>; <sup>1</sup>H NMR (400 MHz, CDCl<sub>3</sub>): δ 2.37 (s, 3H), 5.53 (s, 2H), 7.23–7.26 (m, 5H), 7.46–7.49 (m, 2H), 7.65–7.70 (m, 3H); <sup>13</sup>C NMR (100 MHz, CDCl<sub>3</sub>): δ 21.3, 53.4, 119.1, 123.1, 125.7, 126.5, 127.5, 129.5, 130.7, 131.0, 131.9, 137.0, 138.2, 148.6.

### 1-(3-Iodo benzyl)-4-(p-tolyl)-1H-1,2,3-triazole (3k)<sup>6</sup>

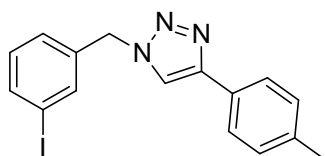

White solid; m.p.: 130–132 °C (Lit. m.p.: 130 °C)<sup>6</sup>; <sup>1</sup>H NMR (400 MHz, CDCl<sub>3</sub>): δ 2.37 (s, 3H), 5.50 (s, 2H), 7.1 (m, 1H), 7.20–7.26 (m, 3H), 7.64–7.71 (m, 5H); <sup>13</sup>C NMR (100 MHz, CDCl<sub>3</sub>): δ 21.3, 53.3, 94.8, 119.1, 125.7, 127.2, 127.6, 129.5, 130.8, 136.9, 137.0, 137.9, 138.2, 148.5.

### 1-Cinnamyl-4-(p-tolyl)-1H-1,2,3-triazole (3l)<sup>6</sup>

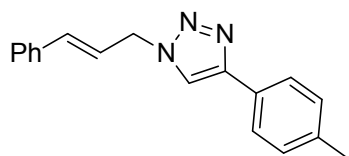

White solid; m.p.: 145–147 °C (Lit. m.p.: 145–147 °C)<sup>6</sup>; <sup>1</sup>H NMR (400 MHz, CDCl<sub>3</sub>): δ 2.33 (s, 3H), 5.13 (dd, *J* = 8, 1.2 Hz, 2H), 6.34–6.39 (m, 1H), 6.68 (d, *J* = 16 Hz, 1H), 7.21 (d, *J* = 8 Hz, 2H), 7.25–7.40 (m, 5H), 7.71 (d, *J* = 8 Hz, 2H), 7.76 (s, 1H); <sup>13</sup>C NMR (100 MHz, CDCl<sub>3</sub>): δ 21.3, 52.4, 119.1, 122.0, 125.6, 126.7, 127.8, 128.6, 128.8, 129.5, 135.3, 135.5, 138.0, 148.2.

### 1-Allyl-4-(p-tolyl)-1H-1,2,3-triazole (3m)<sup>6</sup>

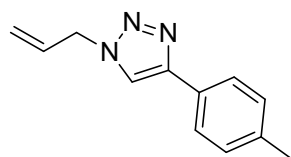



Pale yellow solid; m.p.: 88–90 °C (Lit. m.p.: 88–90 °C)<sup>6</sup>; <sup>1</sup>H NMR (400 MHz, CDCl<sub>3</sub>): δ 2.34 (s, 3H), 4.95 (d, *J* = 6 Hz, 2H), 5.27–5.34 (m, 2H), 5.97–6.01 (m, 1H), 7.19 (d, *J* = 8 Hz, 2H), 7.69 (d, *J* = 9.2 Hz, 3H); <sup>13</sup>C NMR (100 MHz, CDCl<sub>3</sub>): δ 21.3, 52.7, 119.2, 120.1, 125.6, 127.8, 129.5, 131.4, 138.0, 148.1.

### 1-Benzyl-4-(4-bromophenyl)-1*H*-1,2,3-triazole (3n)<sup>1</sup>

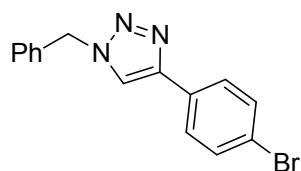

White solid; m.p.: 142–143 °C (Lit. m.p.: 144 °C)<sup>1</sup>; <sup>1</sup>H NMR (400 MHz, CDCl<sub>3</sub>): δ 5.54 (s, 2H), 7.29 (s, 2H), 7.36 (s, 3H), 7.49 (d, *J* = 1.6 Hz, 2H), 7.64 (d, *J* = 8 Hz, 3H); <sup>13</sup>C NMR (100 MHz, CDCl<sub>3</sub>): δ 54.3, 119.7, 122.0, 127.2, 128.1, 128.9, 129.2, 129.5, 131.9, 134.5, 147.1.

### 1-Benzyl-4-(4-nitrophenyl)-1*H*-1,2,3-triazole (3o)<sup>8</sup>

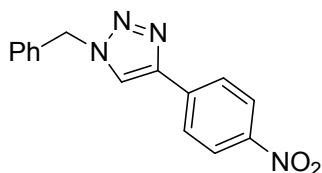

Yellow solid; m.p.: 166–168 °C (Lit. m.p.: 171–172 °C)<sup>8</sup>; <sup>1</sup>H NMR (400 MHz, DMSO-*d*<sub>6</sub>): δ 5.66 (s, 2H), 7.34 (d, *J* = 6.8 Hz, 5H), 8.09–8.10 (m, 2H), 8.26–8.28 (m, 2H), 8.88 (s, 1H); <sup>13</sup>C NMR (100 MHz, DMSO-*d*<sub>6</sub>): δ 53.7, 124.1, 124.8, 126.4, 128.5, 128.7, 129.3, 136.1, 137.5, 145.2, 147.0.

### 1-Benzyl-4-(4-methoxyphenyl)-1*H*-1,2,3-triazole (3p)<sup>1</sup>

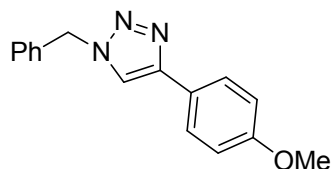

White solid; m.p.: 139–140 °C (Lit. m.p.: 139–141 °C)<sup>1</sup>; <sup>1</sup>H NMR (400 MHz, CDCl<sub>3</sub>): δ 3.79 (s, 1H), 5.51 (s, 2H), 6.90 (dd, *J* = 7.2, 2 Hz, 2H), 7.25–7.28 (m, 2H), 7.32–7.35 (m, 3H), 7.58 (s, 1H), 7.70 (dd, *J* = 6.8, 1.6 Hz, 2H); <sup>13</sup>C NMR (100 MHz, CDCl<sub>3</sub>): δ 54.1, 55.3, 114.2, 118.8, 123.3, 127.0, 128.0, 128.7, 129.1, 134.8, 148.1, 159.6.

**1-(3-Nitrobenzyl)-4-phenyl-1H-1,2,3-triazole (3q)<sup>9</sup>**

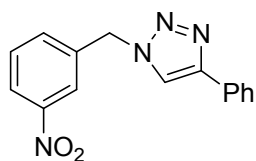

Yellow solid; m.p.: 150–152 °C (Lit. m.p.: 150–153 °C)<sup>9</sup>; **<sup>1</sup>H NMR (400 MHz, CDCl<sub>3</sub>):** δ 5.66 (s, 2H), 7.31–7.33 (m, 1H), 7.37–7.41 (m, 2H), 7.52–7.56 (m, 1H), 7.60 (d, *J* = 7.6 Hz, 1H), 7.78–7.98 (m, 3H), 8.17–8.19 (m, 2H); **<sup>13</sup>C NMR (100 MHz, CDCl<sub>3</sub>):** δ 53.2, 119.8, 122.8, 123.7, 125.7, 128.5, 128.9, 130.1, 130.4, 133.9, 136.8, 148.5, 148.6.

**Table S1 Comparison of catalytic performances of various Ni, Cu and other transition metal catalysts in AAC**

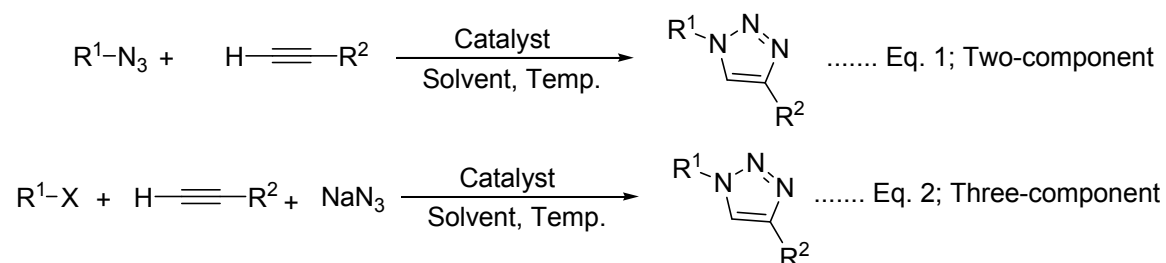

| Entry | Catalyst                                                              | Reaction conditions                                                                 | Merits                                                                                                                           | Limitations                                                                                                              | Yield (%)    | Ref              |
|-------|-----------------------------------------------------------------------|-------------------------------------------------------------------------------------|----------------------------------------------------------------------------------------------------------------------------------|--------------------------------------------------------------------------------------------------------------------------|--------------|------------------|
| 1     | Raney Ni,<br>Catalyst load:<br>20 mol%                                | Toluene, 45 °C, 14 h, N <sub>2</sub><br>(Two-component)                             | Mechanism proposed on the basis of isotope labelling experiment                                                                  | Mixture of regioisomers, limited substrate scope, instability of Raney Ni                                                | 89–93        | 10               |
| 2     | Cp <sub>2</sub> Ni–Xantphos,<br>Catalyst load: 10 mol%                | Cs <sub>2</sub> CO <sub>3</sub> , H <sub>2</sub> O, r.t., 1.5–17 h, (Two-component) | Reaction at r.t. & on–water                                                                                                      | Mixture of regioisomers, Requires base and ligand Xantphos                                                               | 42–95        | 11               |
| 3     | Ni–TLOP,<br>Catalyst load:<br>5 mg per mmol<br>(Ni content not given) | hν, 4M NaCl, r.t., 2–5 h,<br>(Two-component)                                        | Regioselective and high yield of triazoles                                                                                       | Catalyst preparation requires expensive chemicals and catalyst becomes active only under visible light irradiation       | 95.5–99.9    | 12               |
| 4     | <b>Ni–rGO–zeolite,</b><br><b>Catalyst load:</b><br><b>≤ 2.6 mol%</b>  | <b>H<sub>2</sub>O, 70–90 °C, 4–6 h,</b><br><b>(Three-component)</b>                 | <b>Easy preparation from cheap chemicals, robust, high efficiency on–water reaction, regioselective synthesis and recyclable</b> | <b>Microstructures of the heterogeneous Ni catalyst not unequivocally established, though major information obtained</b> | <b>77–94</b> | <b>This work</b> |

|    |                                                                                          |                                                                                |                                                                                                                             |                                                                          |       |    |
|----|------------------------------------------------------------------------------------------|--------------------------------------------------------------------------------|-----------------------------------------------------------------------------------------------------------------------------|--------------------------------------------------------------------------|-------|----|
| 5  | Cu <sub>2</sub> O@ARF<br>Catalyst load:<br>25 mg per mmol                                | H <sub>2</sub> O, SDS, r.t., 1–8 h,<br>(Three–component)                       | Heterogeneous polymeric Cu<br>catalyst, on–water reaction,<br>multi–component approach                                      | Requirement of phase<br>transfer catalyst (SDS)                          | 68–92 | 6  |
| 6  | Cu(II) poly–5–<br>vinyltetrazolate<br>Catalyst load:<br>0.5 mol%                         | H <sub>2</sub> O, r.t., 0.5–6 h,<br>(Three–component)                          | Heterogeneous polymeric Cu<br>catalyst, on–water reaction,<br>catalyst recyclable for 8 runs<br>with 10% drop in conversion | Limited substrate scope<br>examined                                      | 64–98 | 13 |
| 7  | Cu@β–CD–PEG–<br>mesoGO<br>Catalyst load: 5 mol%                                          | H <sub>2</sub> O, r.t., 1–2 h,<br>(Three–component)                            | On–water reaction at ambient<br>temperature, catalyst<br>recyclable for 10 runs                                             | Catalyst preparation requires<br>several steps                           | 82–91 | 14 |
| 8  | [Rh(CO) <sub>2</sub> Cl] <sub>2</sub><br>Catalyst load: 2 mol%                           | MeCN, r.t., 0.5–24 h,<br>(Two–component)                                       | Reaction at r.t. to 100 °C,<br>Reaction mechanism<br>proposed on the basis of<br>control experiment and DFT<br>studies      | Expensive catalyst<br>and not recyclable                                 | 22–98 | 15 |
| 9  | Metalloprotein<br>inspired Ru–<br>polymeric complex<br>Catalyst load: 0.4 mg<br>per mmol | H <sub>2</sub> O, r.t., 0.16–3 h,<br>(Both two–component<br>& Three–component) | On–water,<br>Gram scale synthesis,<br>Recyclability checked for 6<br>runs                                                   | Two steps catalyst<br>preparation, expensive<br>chemicals and metal salt | 82–98 | 16 |
| 10 | [Ir(cod)Cl] <sub>2</sub><br>Catalyst load:<br>2 mol%                                     | CH <sub>2</sub> Cl <sub>2</sub> , r.t., 8 h,<br>(Two–component)                | Synthesis of bioactive<br>scaffold, biocompatible<br>synthesis explored                                                     | Expensive catalyst, DCM<br>solvent, catalyst not<br>recyclable           | 61–95 | 17 |

|    |                                                                                                       |                                                                                         |                                                           |                                                           |       |    |
|----|-------------------------------------------------------------------------------------------------------|-----------------------------------------------------------------------------------------|-----------------------------------------------------------|-----------------------------------------------------------|-------|----|
| 11 | Ag–Al <sub>2</sub> O <sub>3</sub> @Fe <sub>2</sub> O <sub>3</sub><br>Catalyst load:<br>20 mg per mmol | Conc. HCl:H <sub>2</sub> O (1:1),<br>r.t., 6 h,<br>(Three–component)                    | Reaction at r.t., Recyclability<br>checked for 5 runs     | Limited substrate scope                                   | 86–96 | 18 |
| 12 | Nanoporous TiO <sub>2</sub><br>supported Au NPs<br>Catalyst load:<br>20 mg per mmol                   | CH <sub>2</sub> Cl <sub>2</sub> , ~100 °C., 0.5 h,<br>(Two–component)                   | Reaction at r.t. and on–water                             | Two–component approach,<br>catalyst not recyclable        | 86–97 | 19 |
| 13 | Zn(OAc) <sub>2</sub><br>Catalyst load:<br>10 mol%                                                     | Ascorbic acid, H <sub>2</sub> O, MW<br>(75–130 °C, 80–150 W),<br>6–9 h, (Two–component) | MW–assisted and on–water<br>reaction                      | Requirement of reducing<br>agent, catalyst not recyclable | 47–97 | 20 |
| 14 | Sm[N(SiMe <sub>3</sub> ) <sub>2</sub> ] <sub>3</sub><br>Catalyst load:<br>5 mol%                      | BuNH <sub>2</sub> , toluene, 50 °C,<br>24 h, (Two–component)                            | Mechanism proposed on the<br>basis of trapping experiment | Requirement of base,<br>catalyst not recyclable           | 30–97 | 21 |

**Table S2 Comparative catalytic performance between Cu<sub>2</sub>O@ARF<sup>6</sup> and Ni-rGO-zeolite**

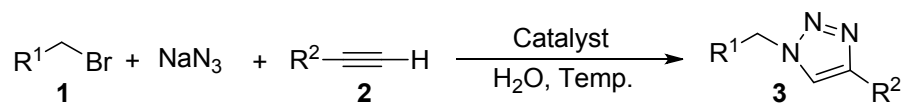

| Entry | R <sup>1</sup>                    | R <sup>2</sup>                    | Cu <sub>2</sub> O@ARF <sup>a</sup> | Ni-rGO-zeolite <sup>b</sup> |
|-------|-----------------------------------|-----------------------------------|------------------------------------|-----------------------------|
| 1     | C <sub>6</sub> H <sub>5</sub>     | C <sub>6</sub> H <sub>5</sub>     | 92%                                | 94%                         |
| 2     | 1-Naphthyl                        | C <sub>6</sub> H <sub>5</sub>     | 79%                                | 85%                         |
| 3     | CH <sub>2</sub> =CH               | 4-MeC <sub>6</sub> H <sub>4</sub> | 82%                                | 94%                         |
| 4     | 3-IC <sub>6</sub> H <sub>4</sub>  | C <sub>6</sub> H <sub>5</sub>     | 76%                                | 91%                         |
| 5     | 3-BrC <sub>6</sub> H <sub>4</sub> | C <sub>6</sub> H <sub>4</sub>     | 78%                                | 90%                         |

Reaction conditions: <sup>a</sup>**1** (1 mmol), **2** (1.2 mmol), NaN<sub>3</sub> (1.5 mmol), Cu<sub>2</sub>O@ARF (25 mg), sodium dodecyl sulfate (0.1 mmol) and H<sub>2</sub>O were stirred at r.t. for 1–8 h. <sup>b</sup>**1** (1 mmol), **2** (1 mmol), NaN<sub>3</sub> (1.5 mmol), Ni-rGO-zeolite (30 mg) and H<sub>2</sub>O (2 mL) were stirred at 70–90 °C for 4–6 h.

## References

1. S.S.E Ghodsinia, B. Akhlaghinia and R. Jahanshahi, *RSC Adv.*, 2016, **6**, 63613-63623.
2. N. Touj, I. Ozdemir, S. Yasar and N. Hamdi, *Inorganica Chim. Acta*, 2017, **467**, 21-32.
3. C. Shao, X. Wang, Q. Zhang, S. Luo, J. Zhao and Y. Hu, *J. Org. Chem.*, 2011, **76**, 6832-6836.
4. A. Coelho, P. Diz, O. Caamano and E. Sotelo, *Adv. Synth. Catal.*, 2010, **352**, 1179-1192.
5. M. d'Halluin, T. Mabit, N. Fairley, V. Fernandez, M. B. Gawande, E. Le Grogneec and F.-X. Felpin, *Carbon*, 2015, **93**, 974-983.
6. S. Ghosh, S. Saha, D. Sengupta, S. Chattopadhyay, G. De and B. Basu, *Ind. Eng. Chem. Res.*, 2017, **66**, 11726-11733.
7. P. S. Reddy and B. Sreedhar, *Synthesis*, 2009, 4203-4207.
8. A. Pourjavadi, N. Safaie, S. H. Hosseini and C. Bennett, *Appl. Organometal. Chem.*, 2015, **29**, 601-607.
9. Z. Ghadamyari, A. Khojastehnezhad, S. M. Seyedi, F. Taghavi and A. Shiri, *ChemistrySelect*, 2020, **5**, 10233-10242.
10. H. S. P. Rao and G. Chakibanda, *RSC Adv.*, 2014, **4**, 46040–46048.

11. W. G. Kim, M. E. Kang, J. B. Lee, M. H. Jeon, S. Lee, J. Lee, B. Choi, P. M. Cal, S. Kang and J.-M. Kee, *J. Am. Chem. Soc.*, 2017, **139**, 12121–12124.
12. D. Yadav, N. Singh, T. W. Kim, J. Y. Kim, N.-J. Park and J.-O. Baeg, *Green Chem.*, 2019, **21**, 2677–2685.
13. A. V. Zuraev, Y. V. Grigoriev, V. A. Vudevich and O. A. Ivashkevich, *Tetrahedron Lett.*, 2018, **59**, 1583–1586.
14. S. Bahadorikhalili, L. Ma'mani, H. Mahdavi and A. Shafiee, *Microporous Mesoporous Mater.*, 2018, **262**, 207–216.
15. Y. Liao, Q. Lu, G. Chen, Y. Yu, C. Li and X. Huang, *ACS Catal.*, 2017, **7**, 7529–7534.
16. A. Gupta, R. Jamatia, M. Mahato and A. K. Pal, *Ind. Eng. Chem. Res.*, 2017, **56**, 2375–2382.
17. R. Chen, L. Zeng, Z. Lai and S. Cui, *Adv. Synth. Catal.*, 2019, **361**, 989–994.
18. P. Basu, P. Bhanja, N. Salam, T. K. Dey, A. Bhaumik, D. Das and Sk. M. Islam, *Mol. Catal.*, 2017, **439**, 31–40.
19. M. Boominathan, N. Pugazhenthiran, M. Nagaraj, S. Muthusubramanian, S. Murugesan and N. Bhuvanesh, *ACS Sustainable Chem. Eng.*, 2013, **1**, 1405–1411.
20. M. A. Morozova, M. S. Yusubov, B. Kratochvil, V. Eigner, A. A. Bondarev, A. Yoshimura, A. Saito, V. V. Zhdankin, M. E. Trusova and P. S. Postnikov, *Org. Chem. Front.*, 2017, **4**, 978–985.
21. L. Hong, W. Lin, F. Zhang, R. Liu and X. Zhou, *Chem. Commun.*, 2013, **49**, 5589–5591.

SI-5. Scanned copies of  $^1\text{H}$  and  $^{13}\text{C}$  NMR spectra of various 1,2,3-triazole derivatives

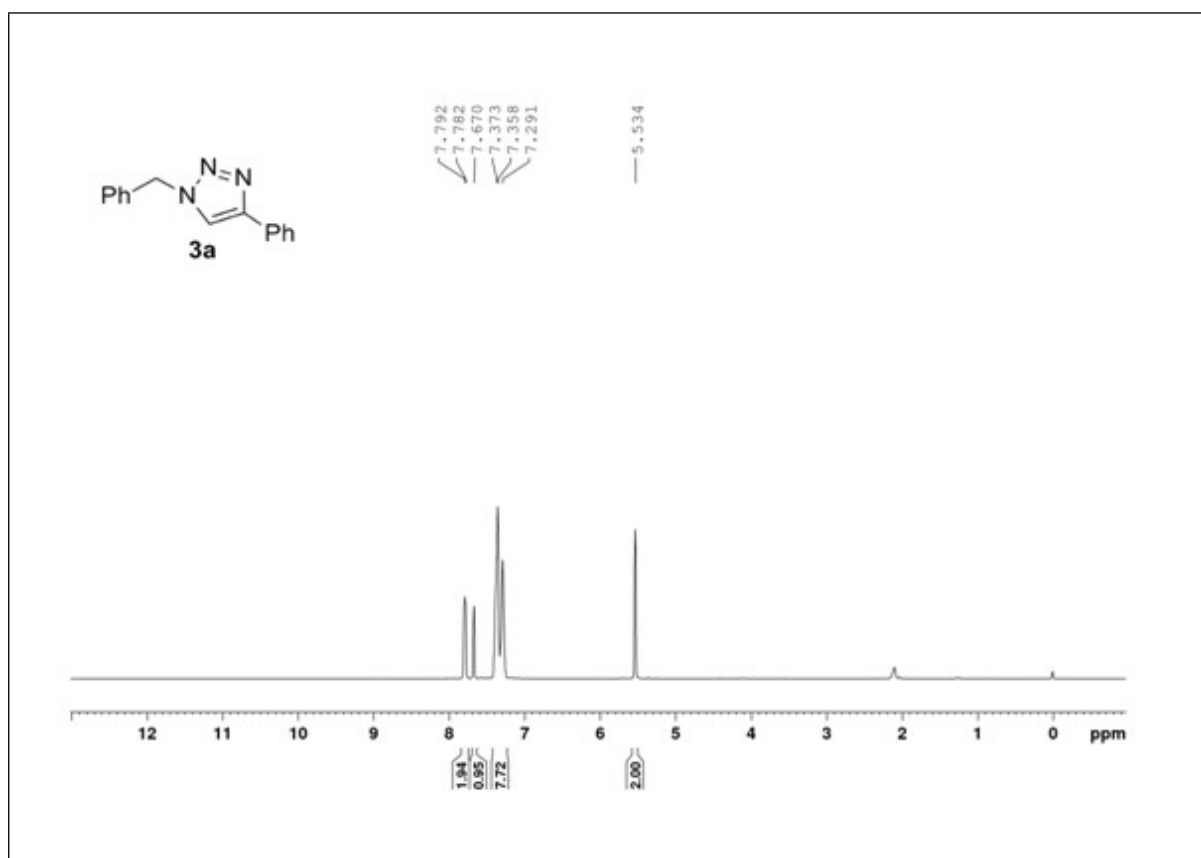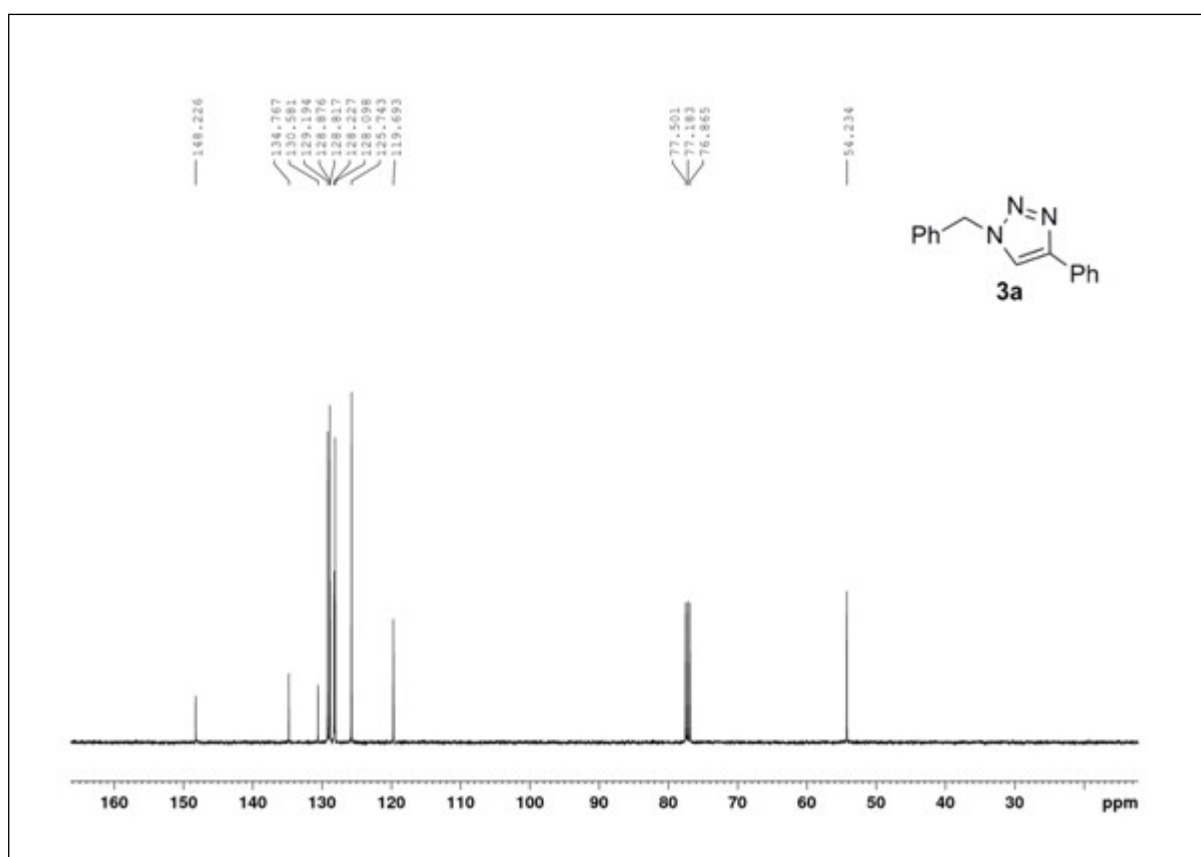



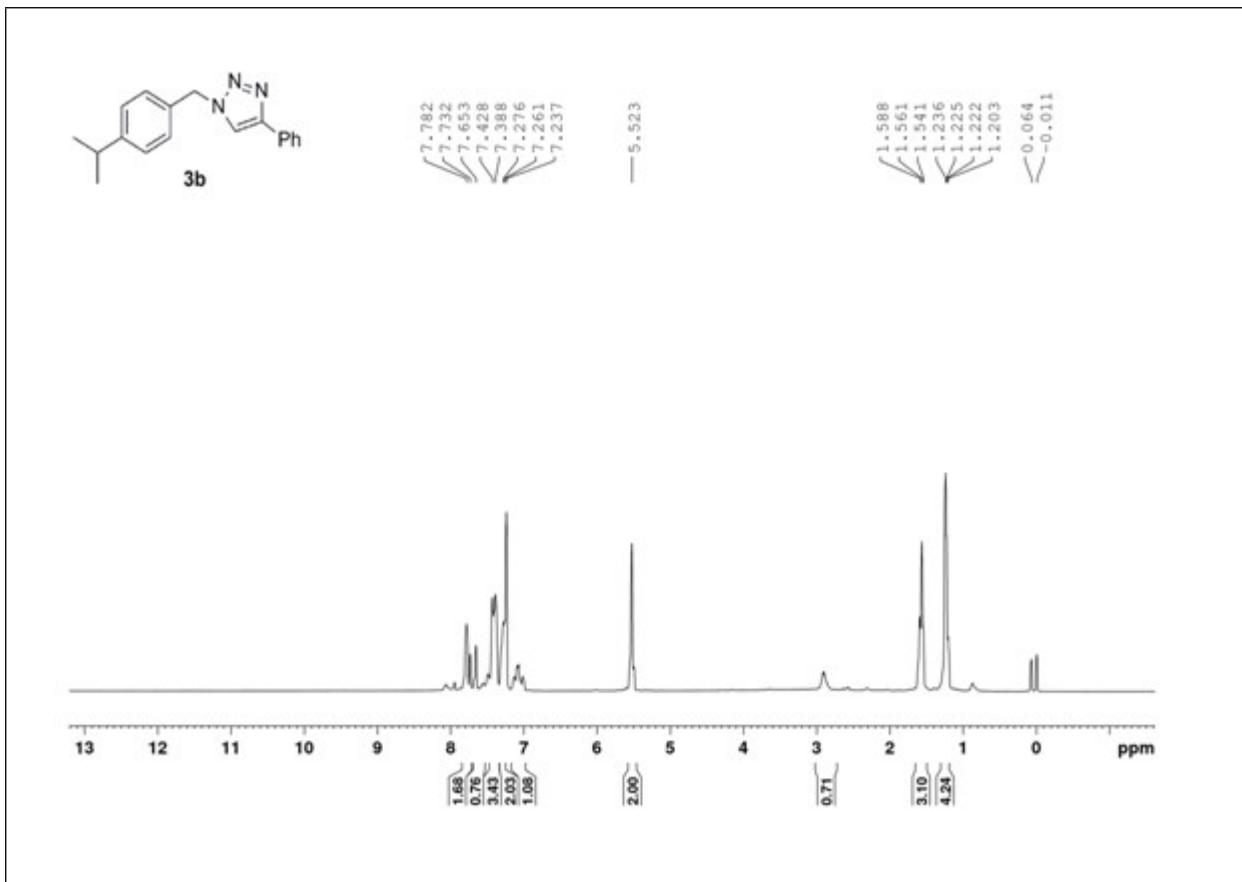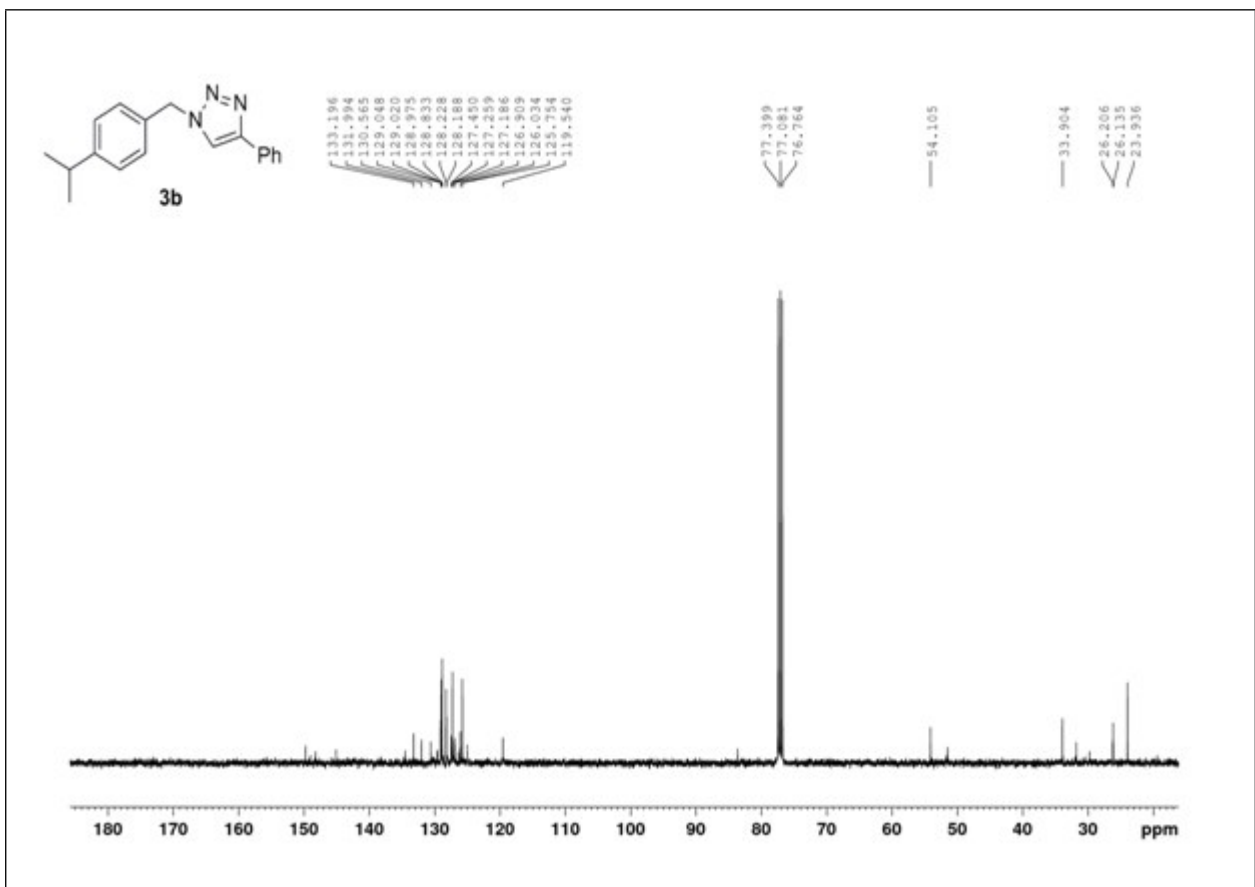

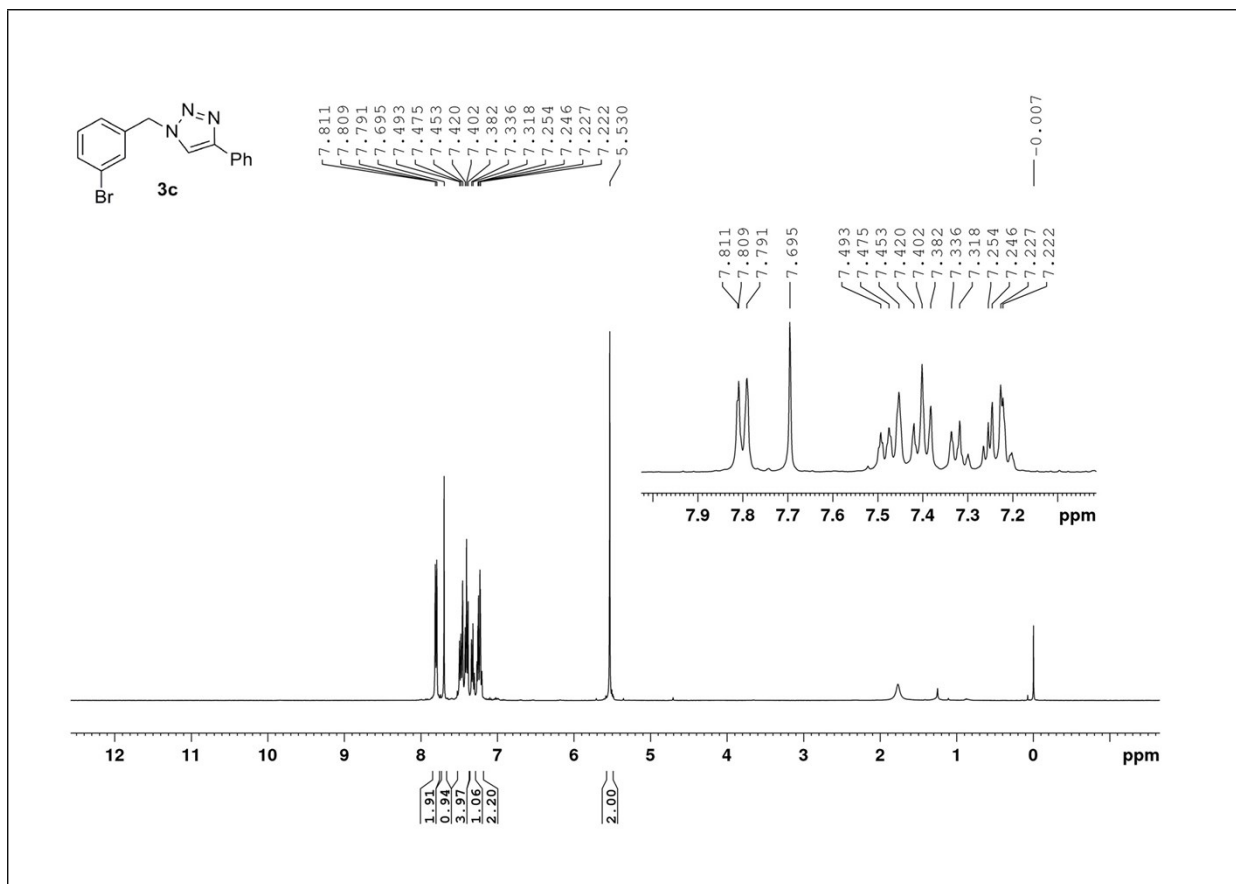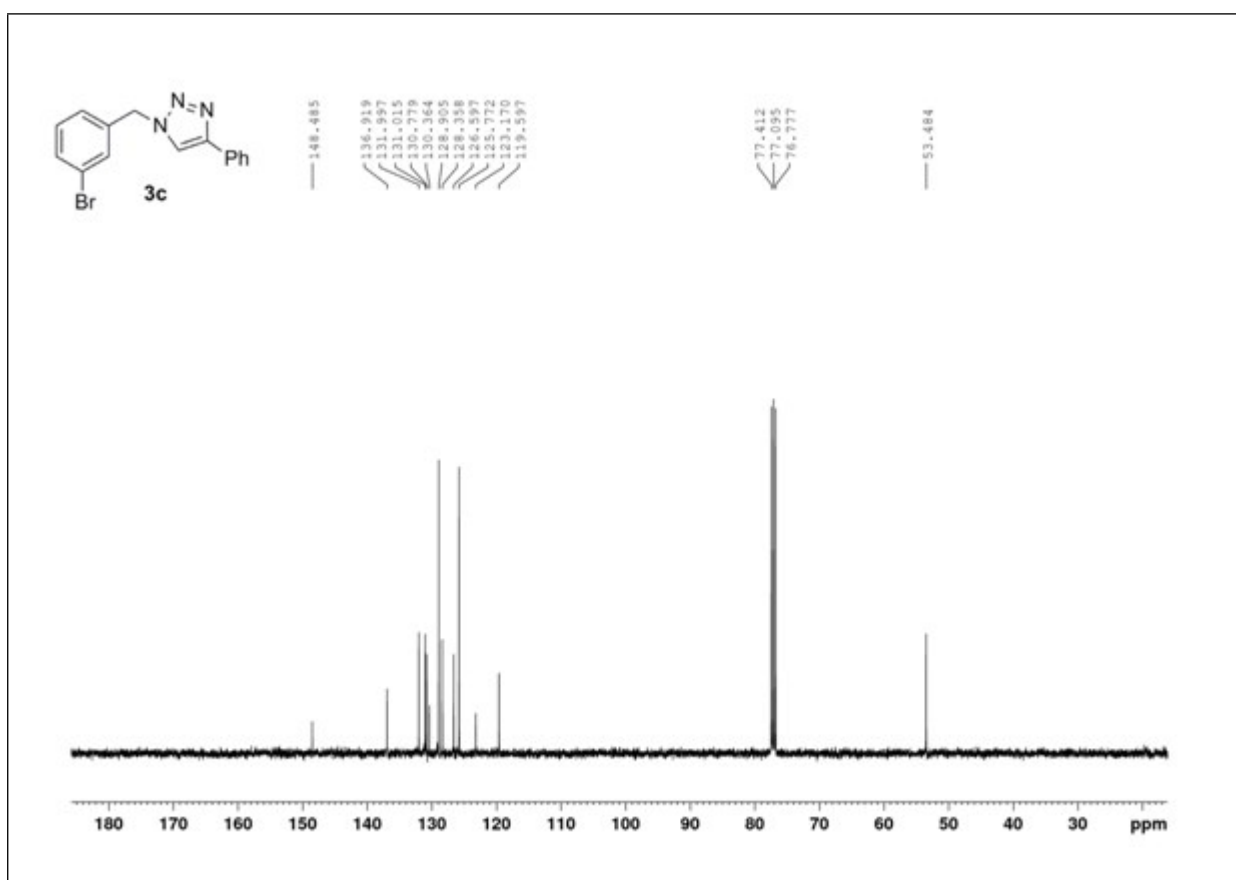

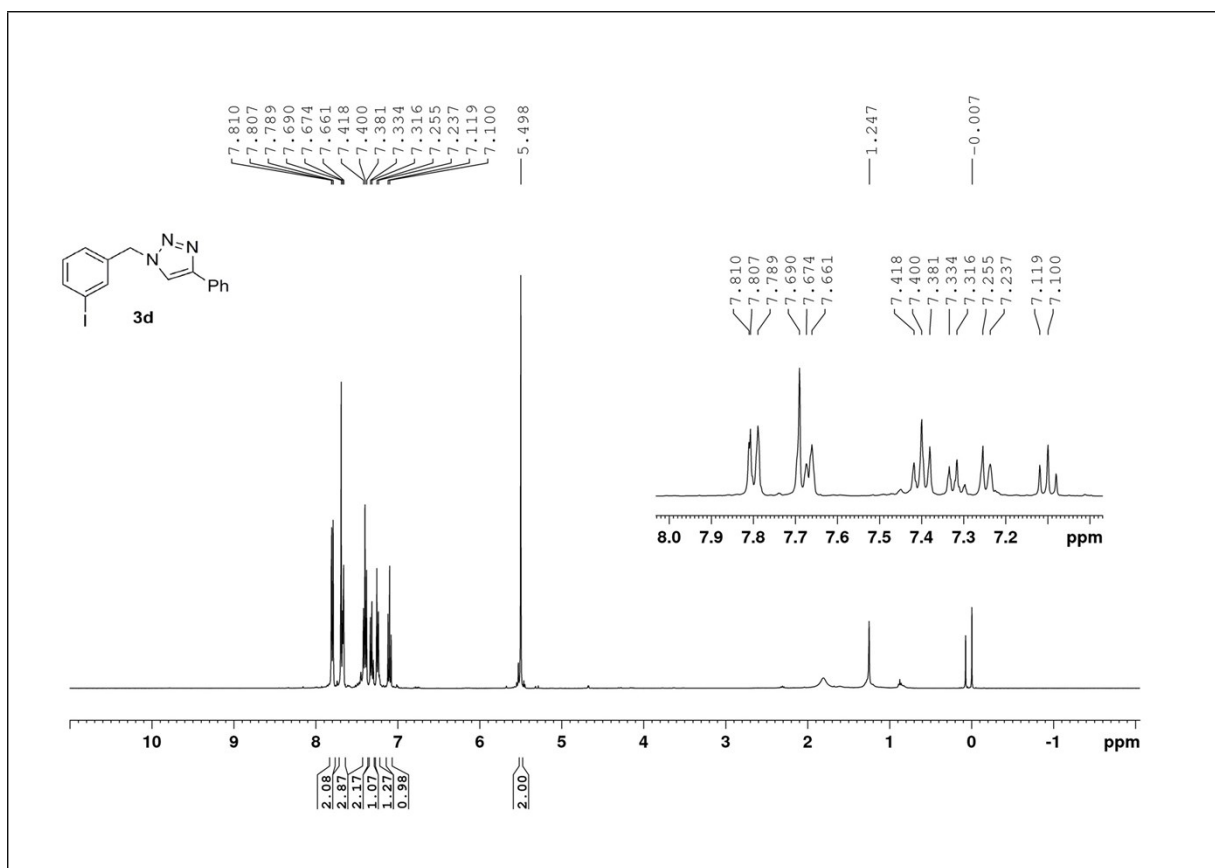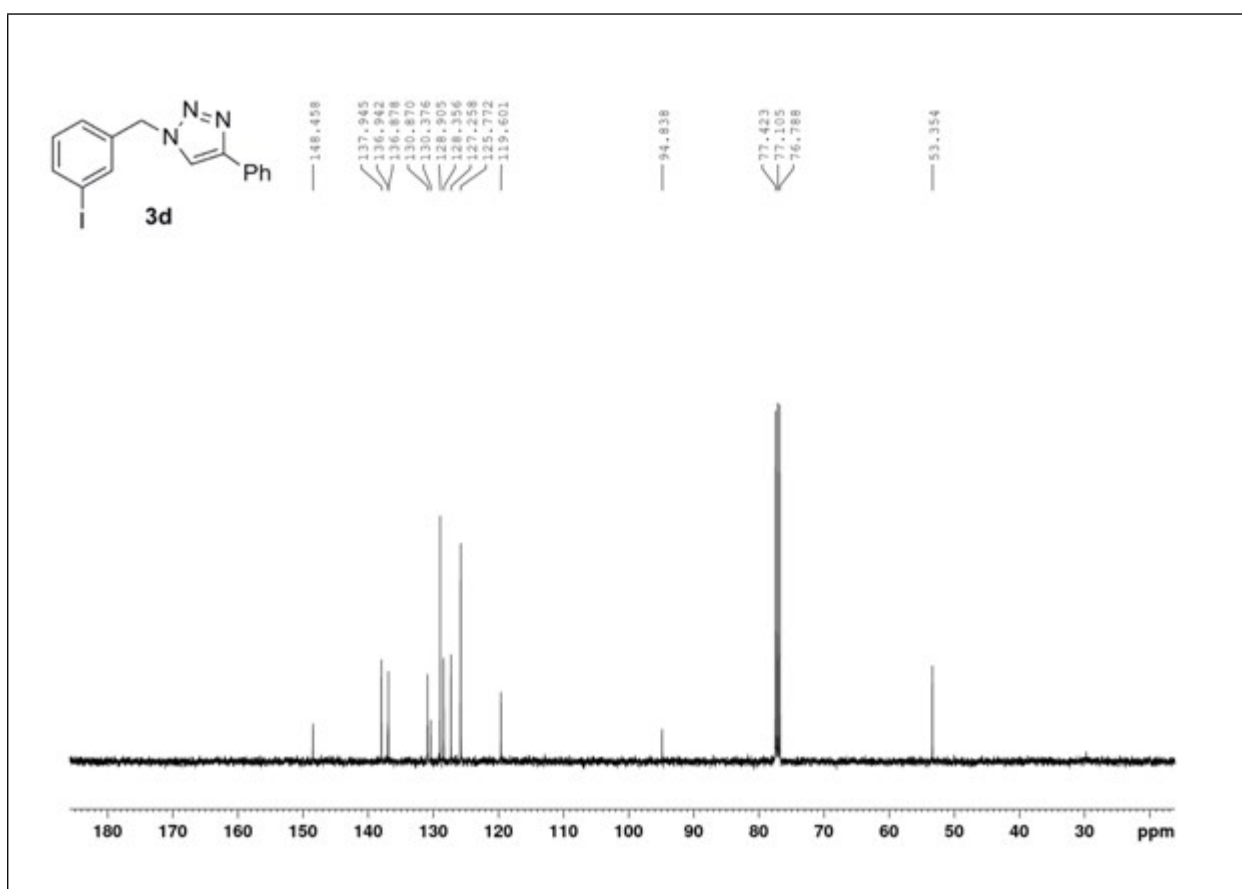

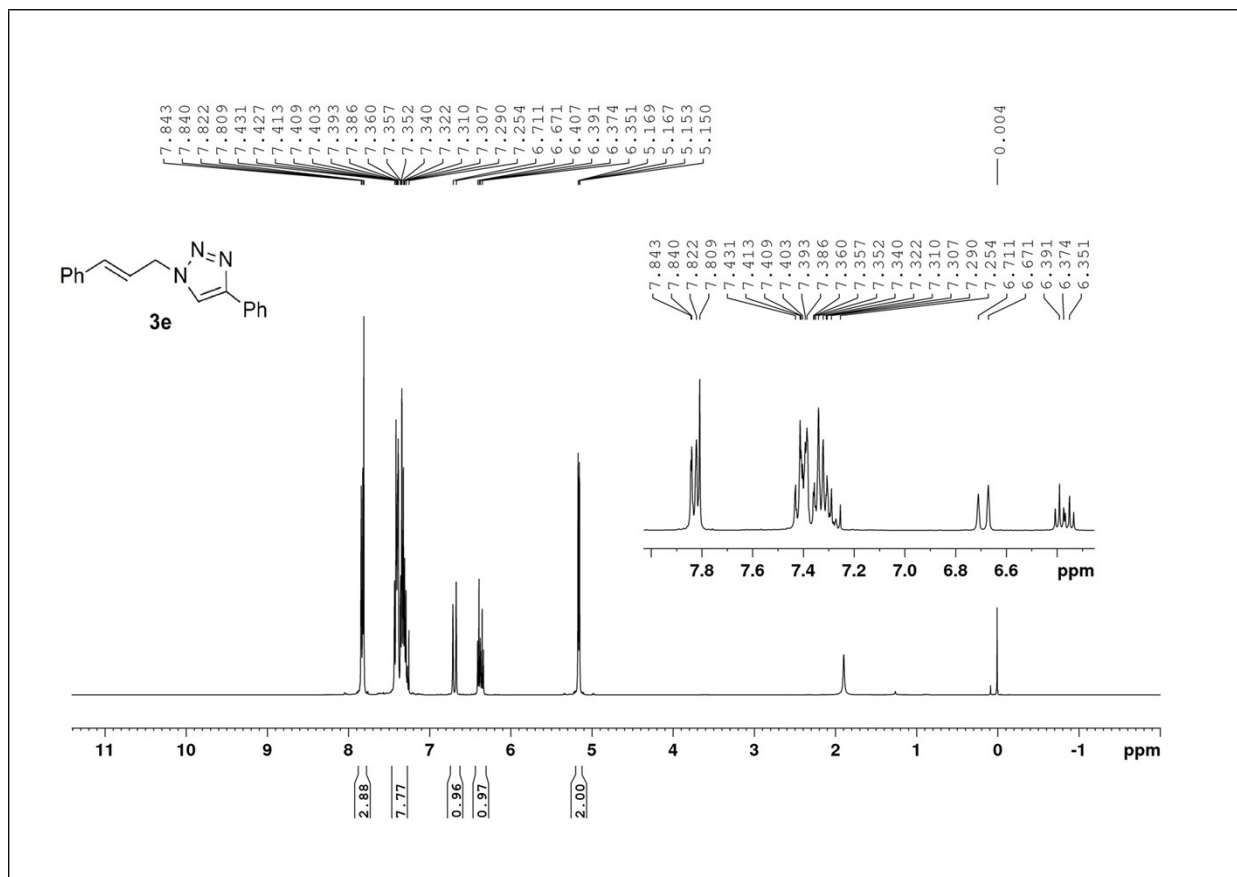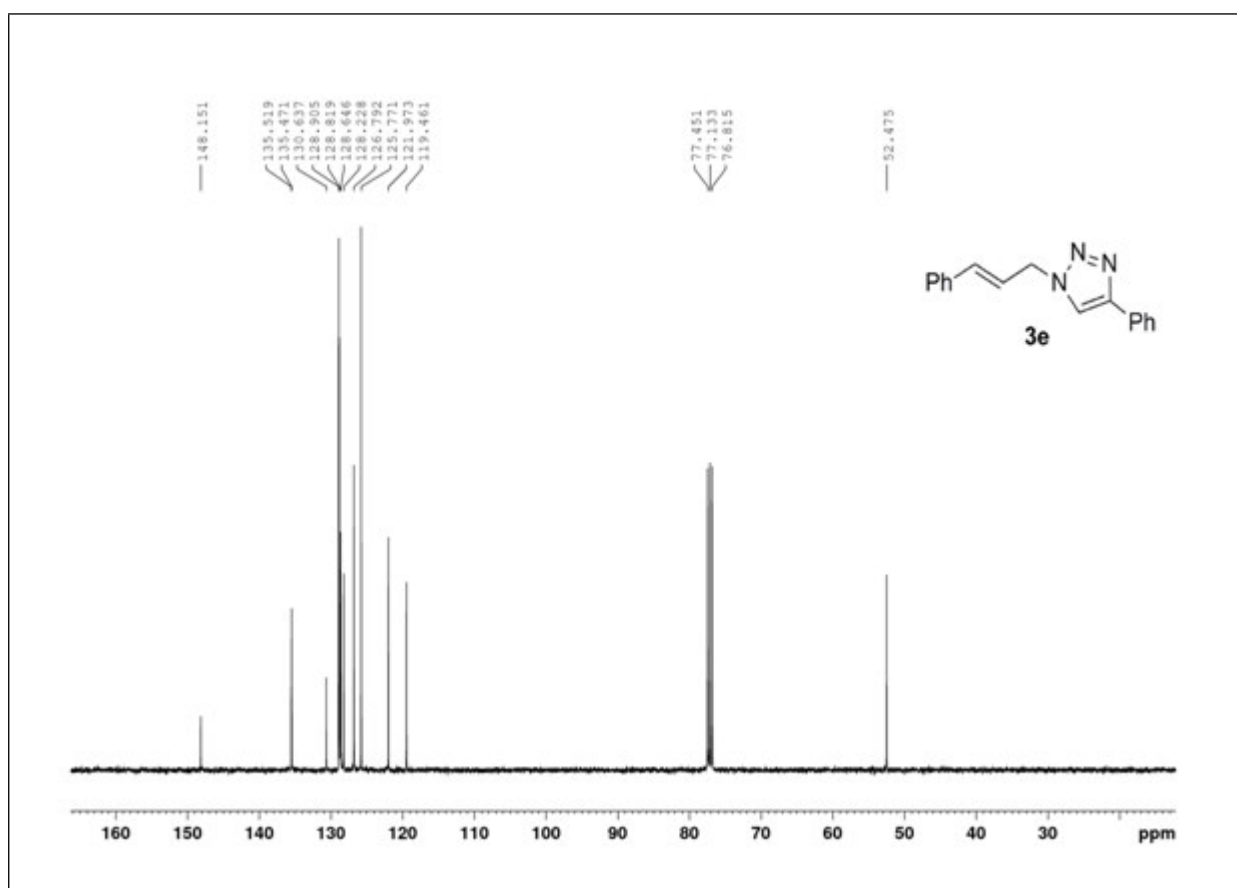

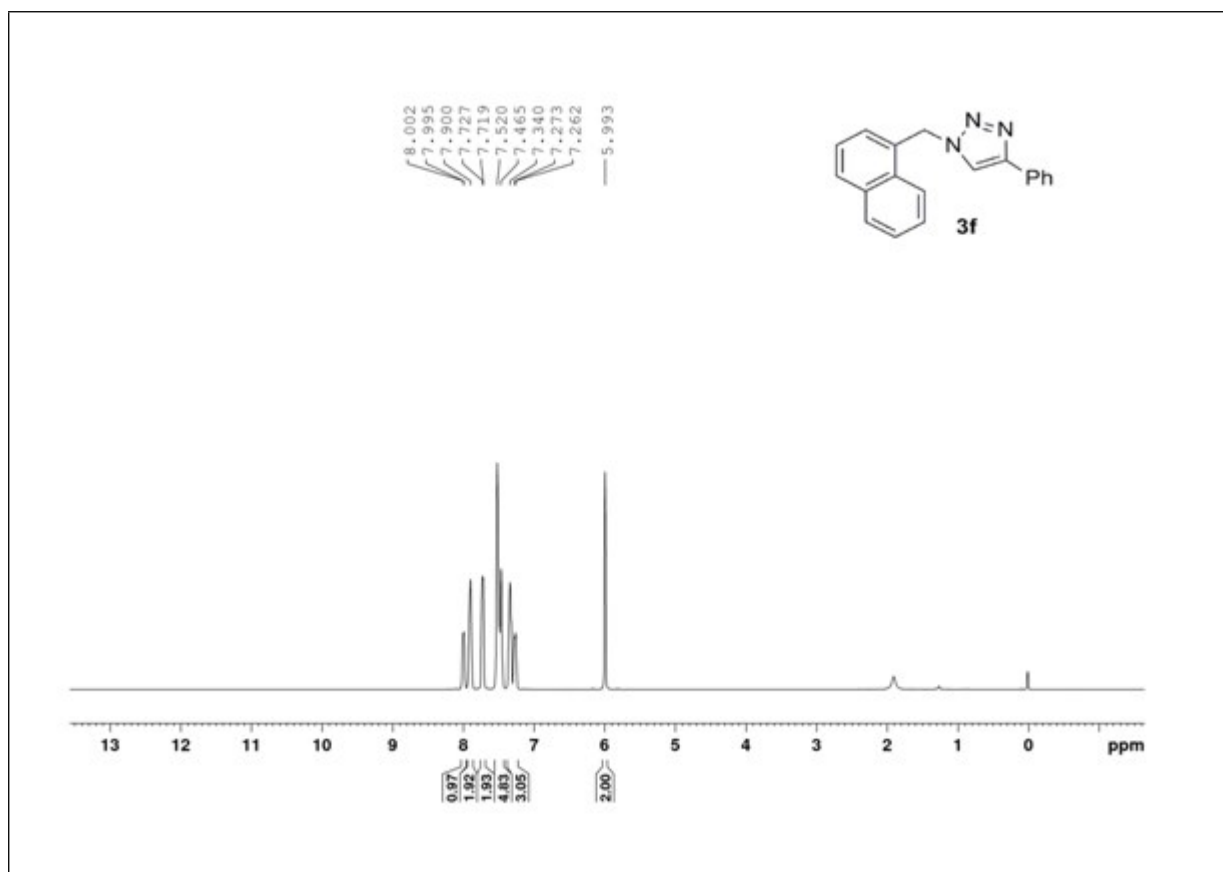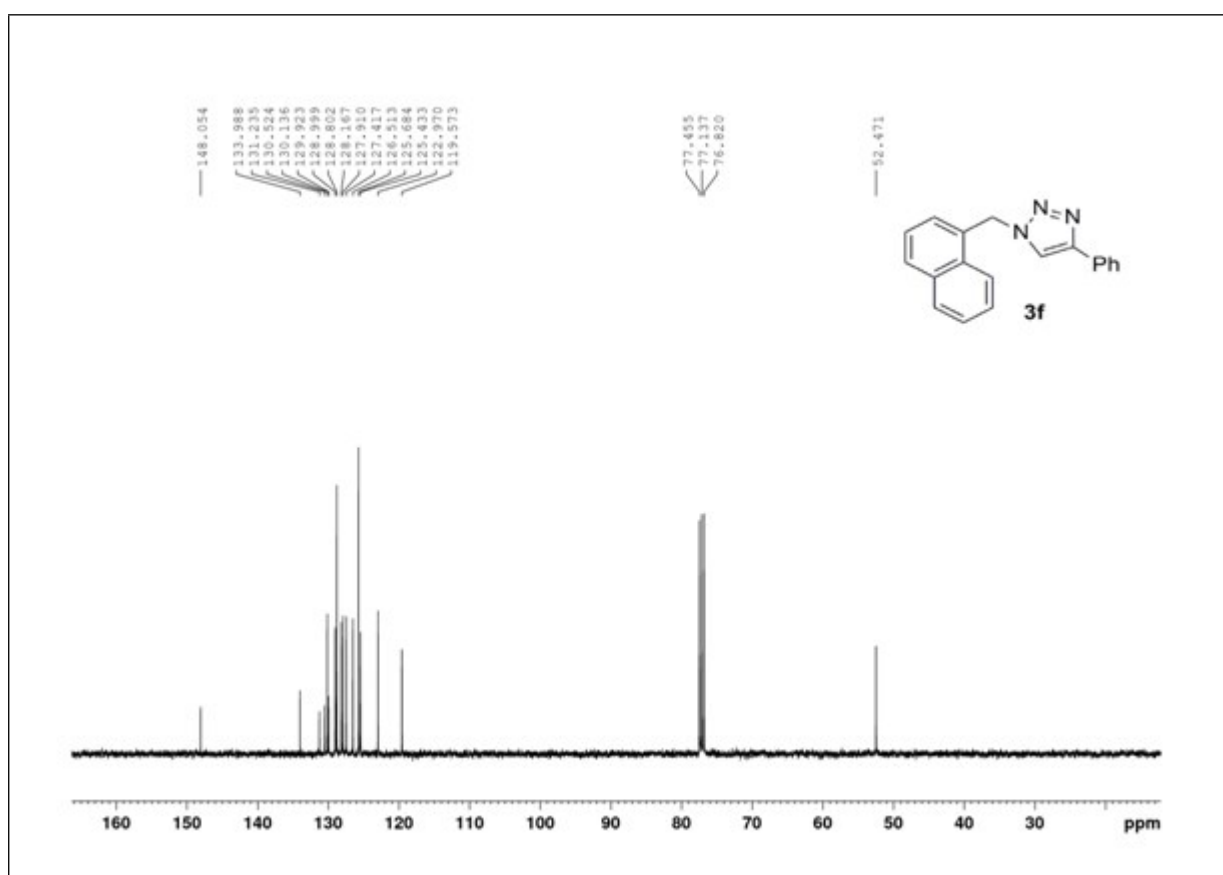

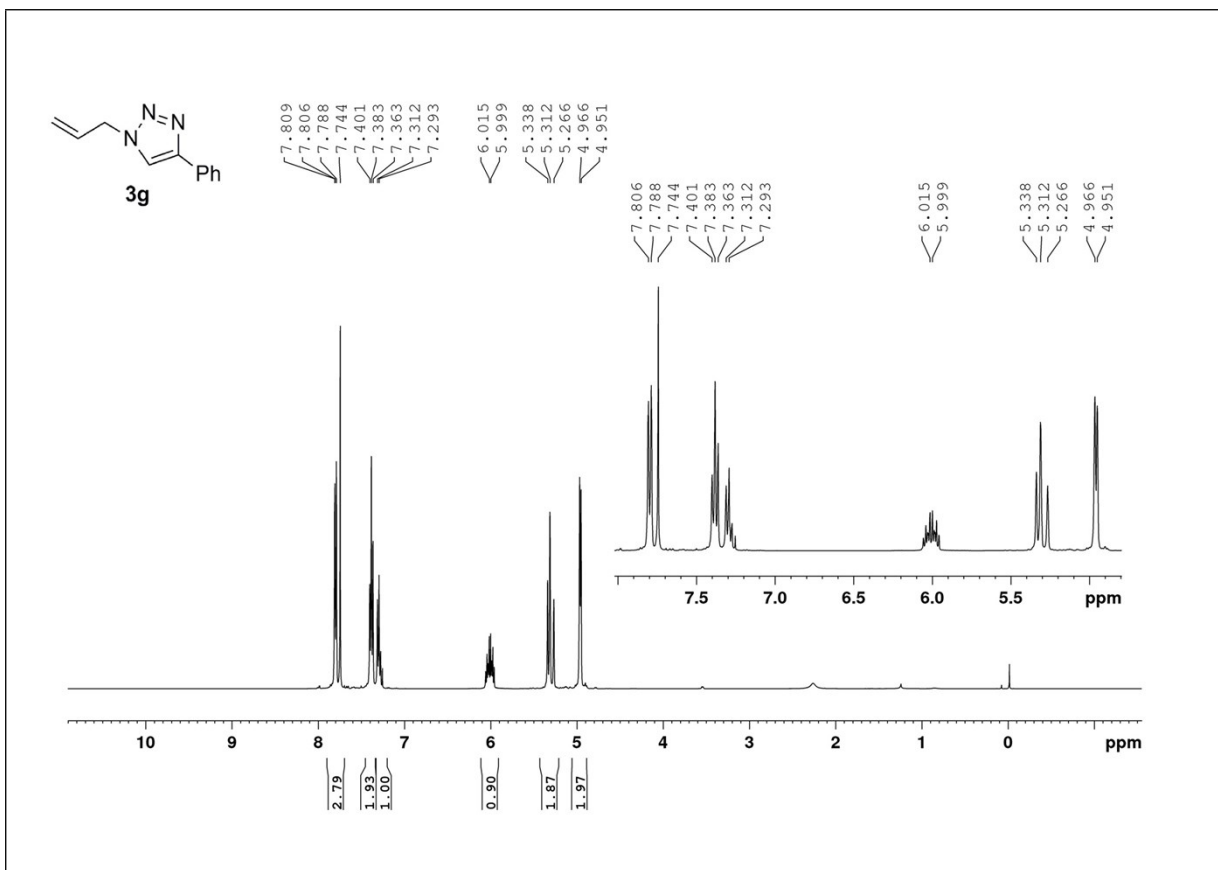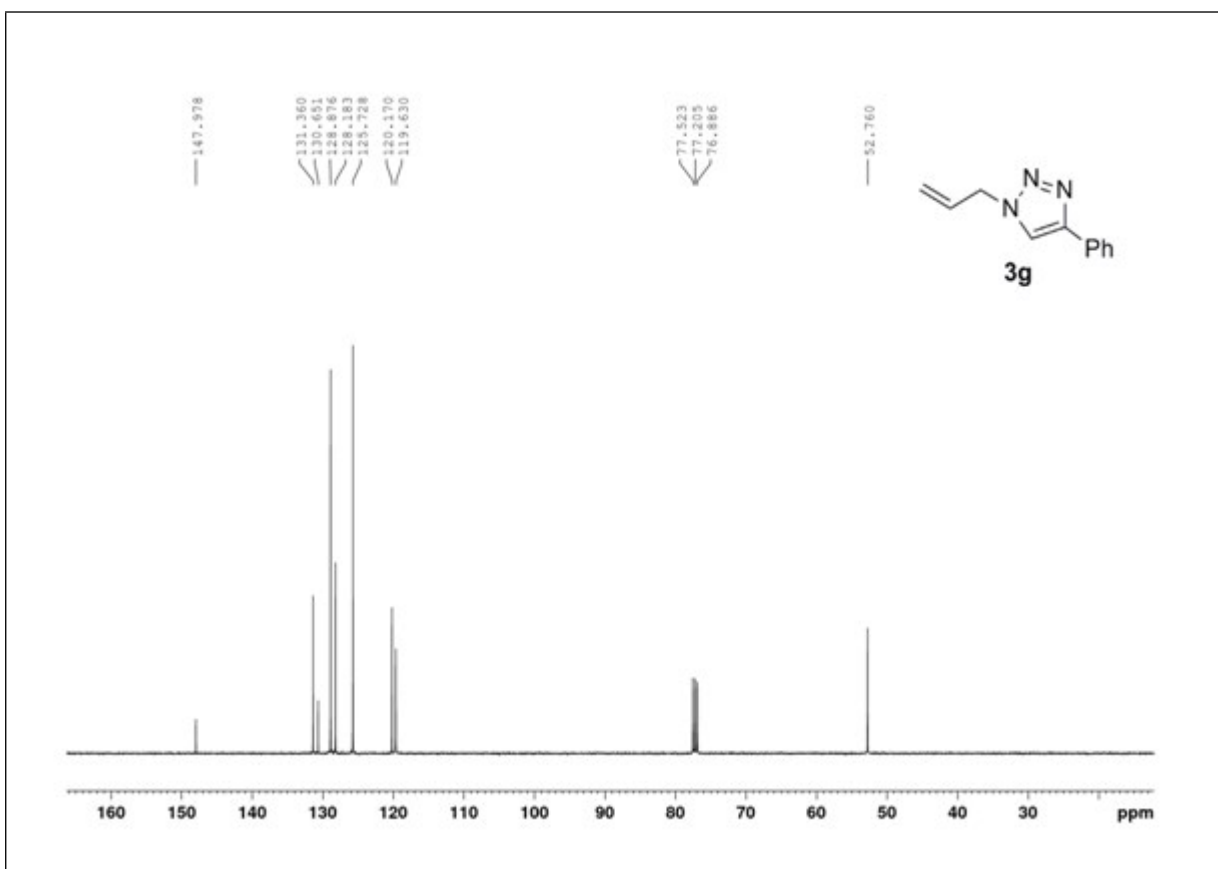

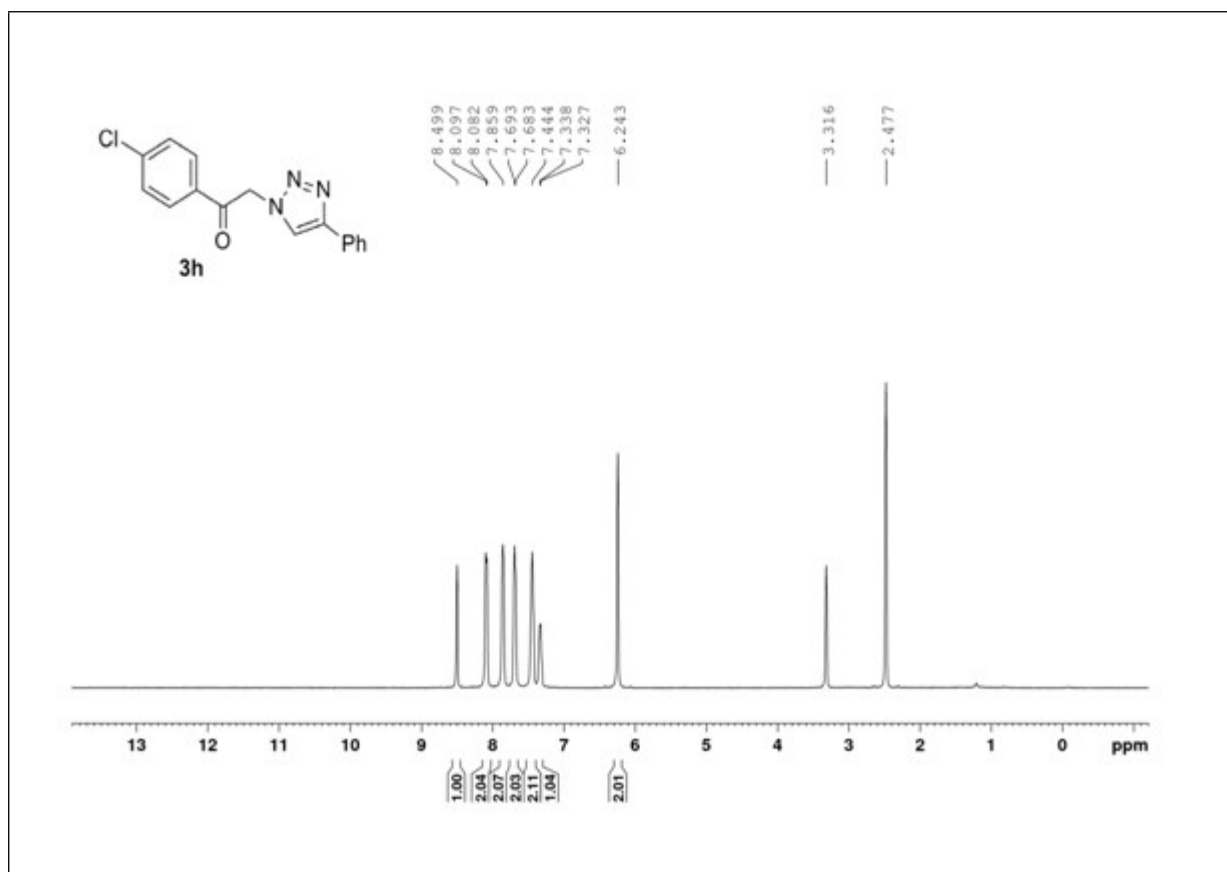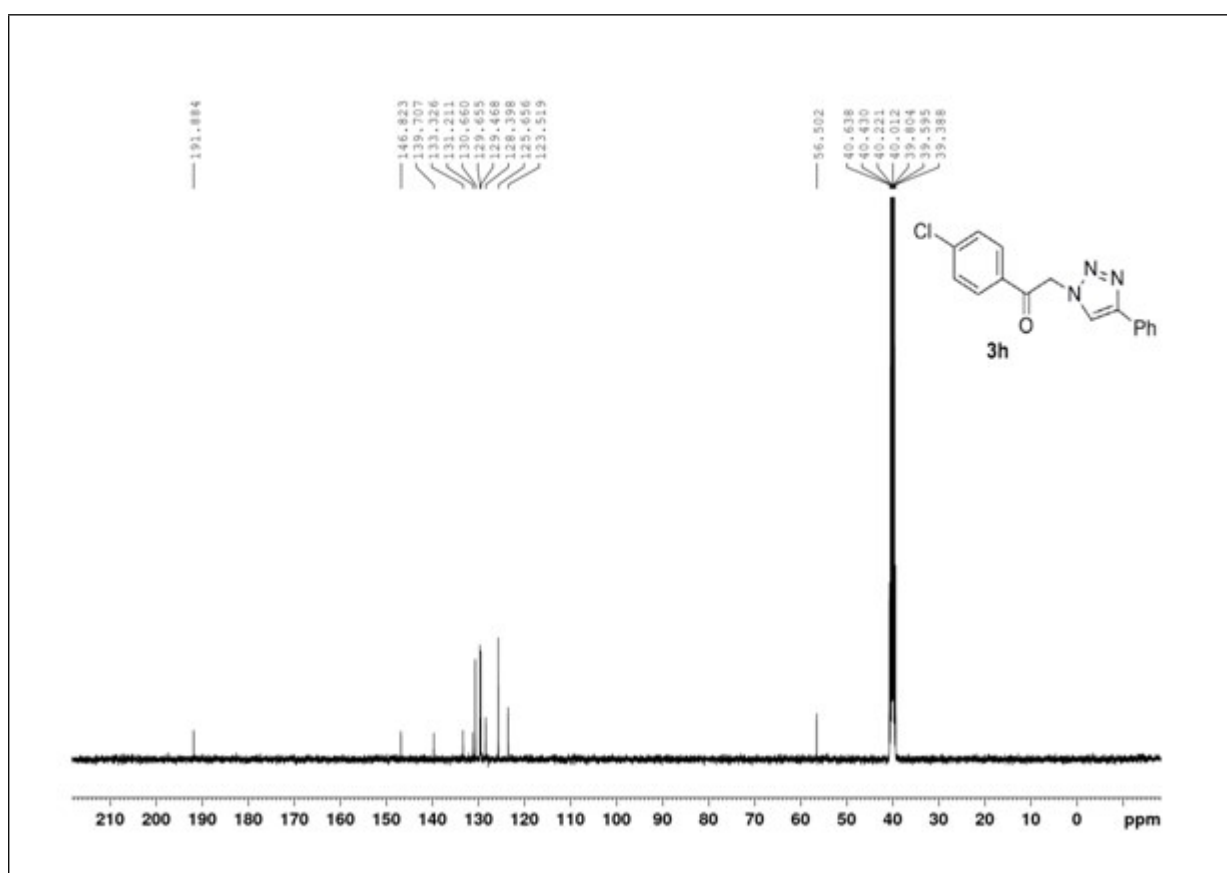

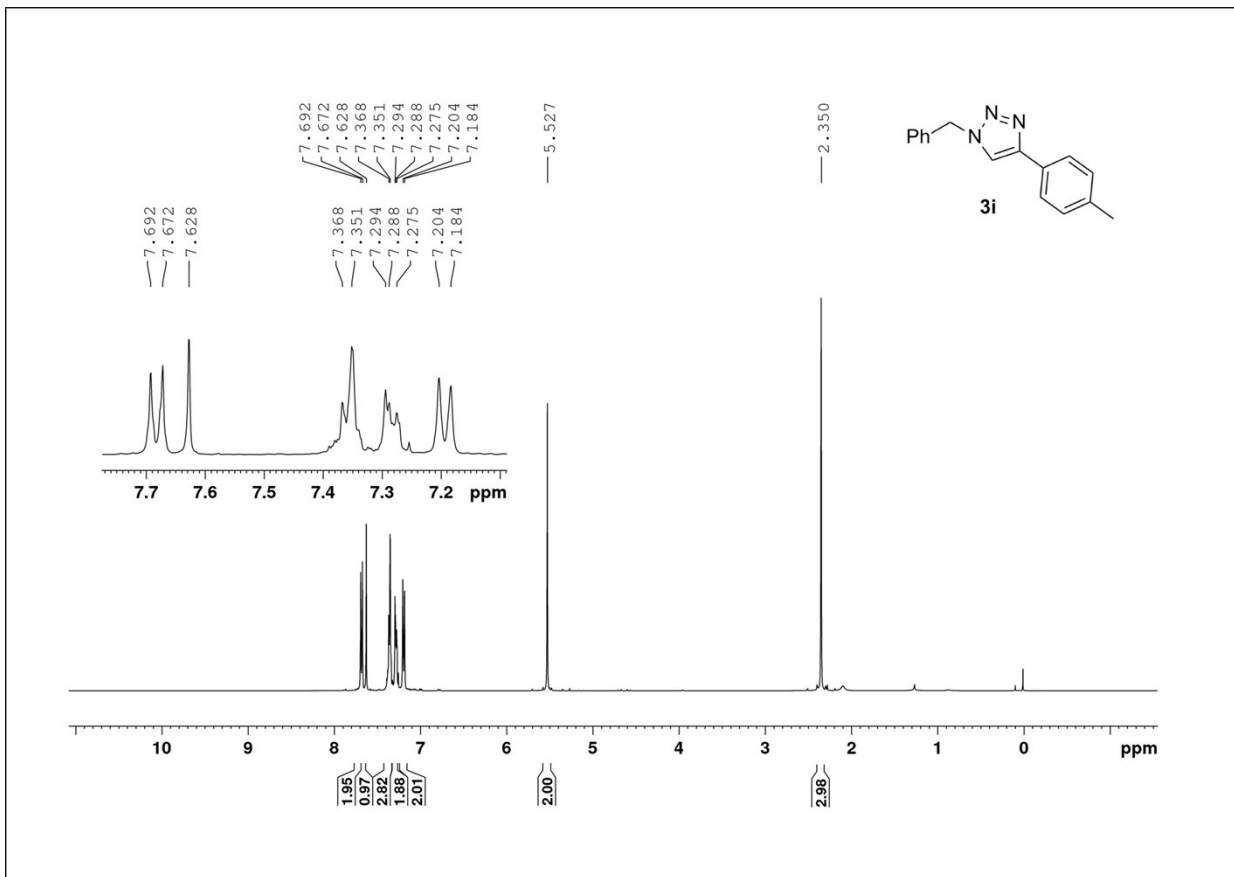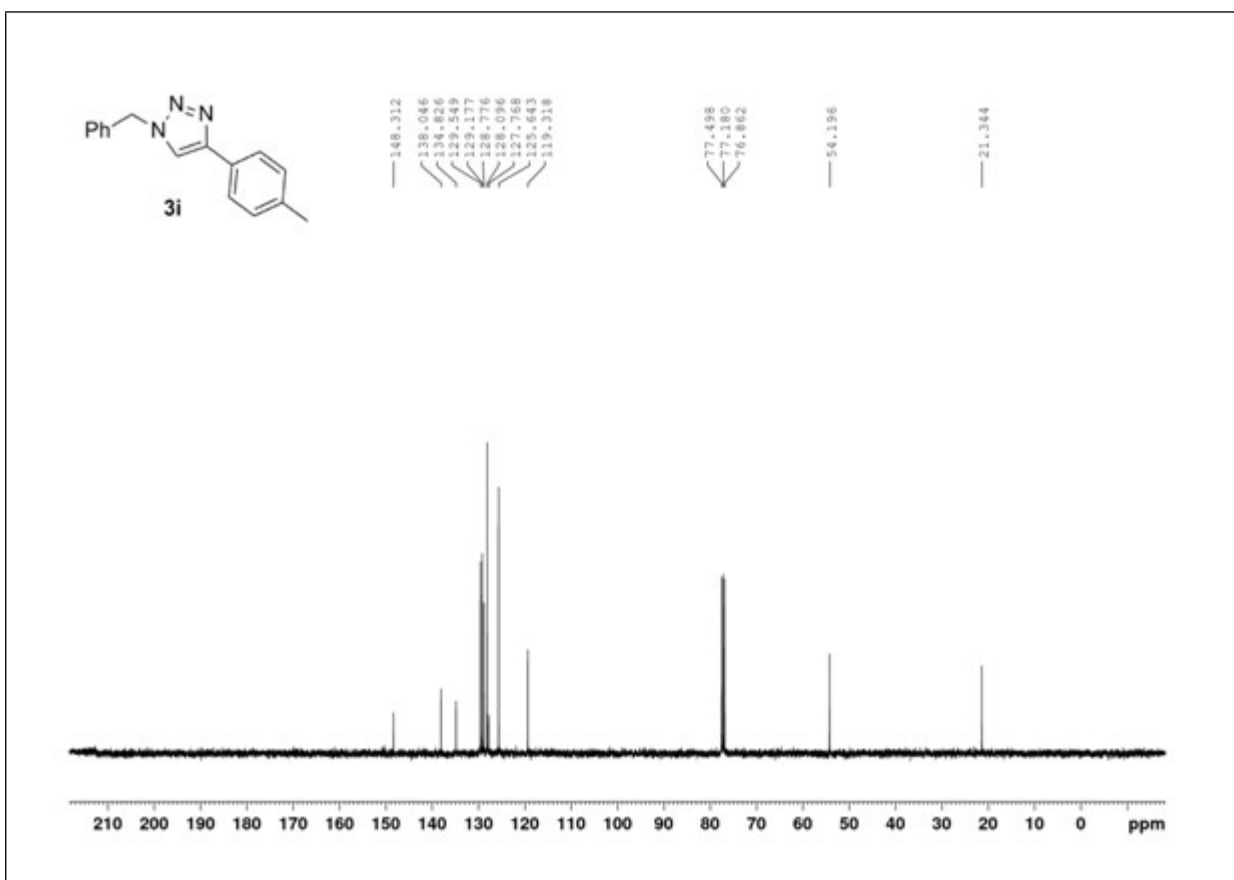



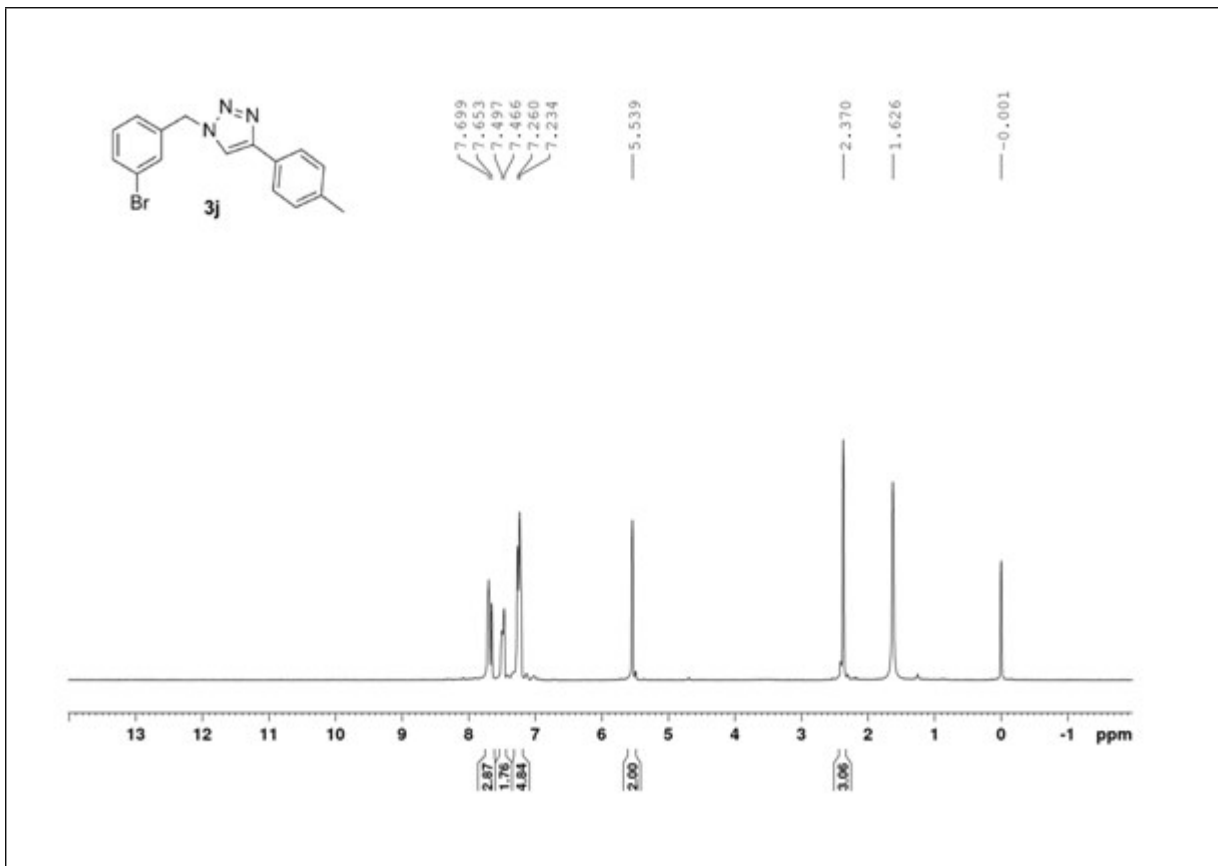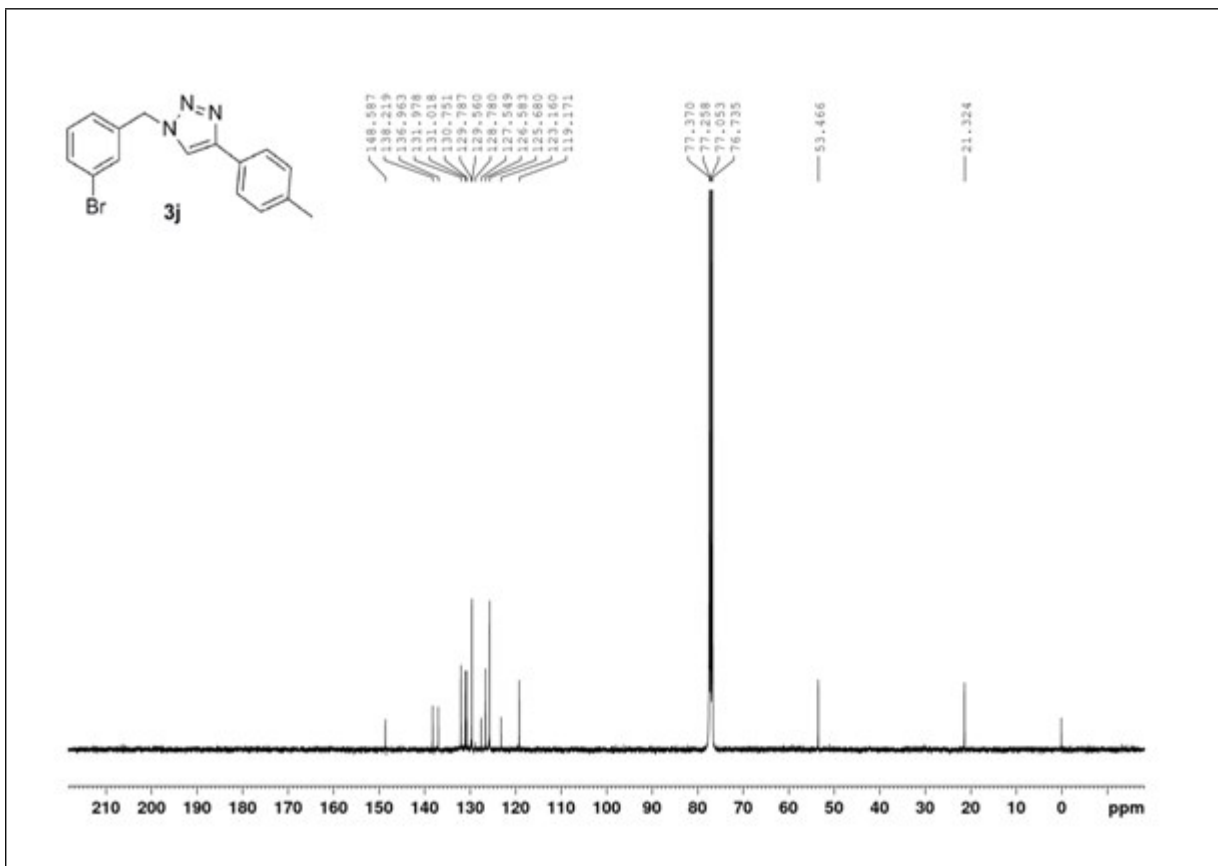

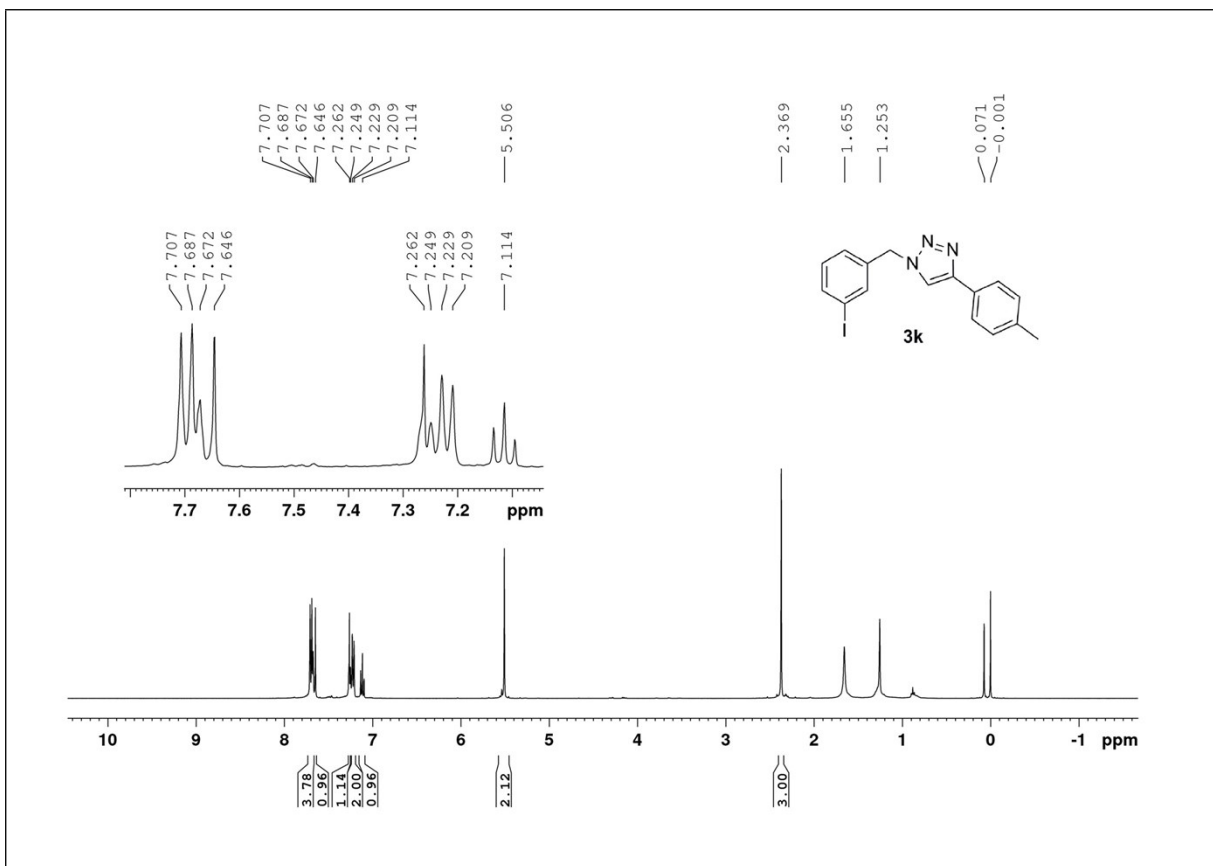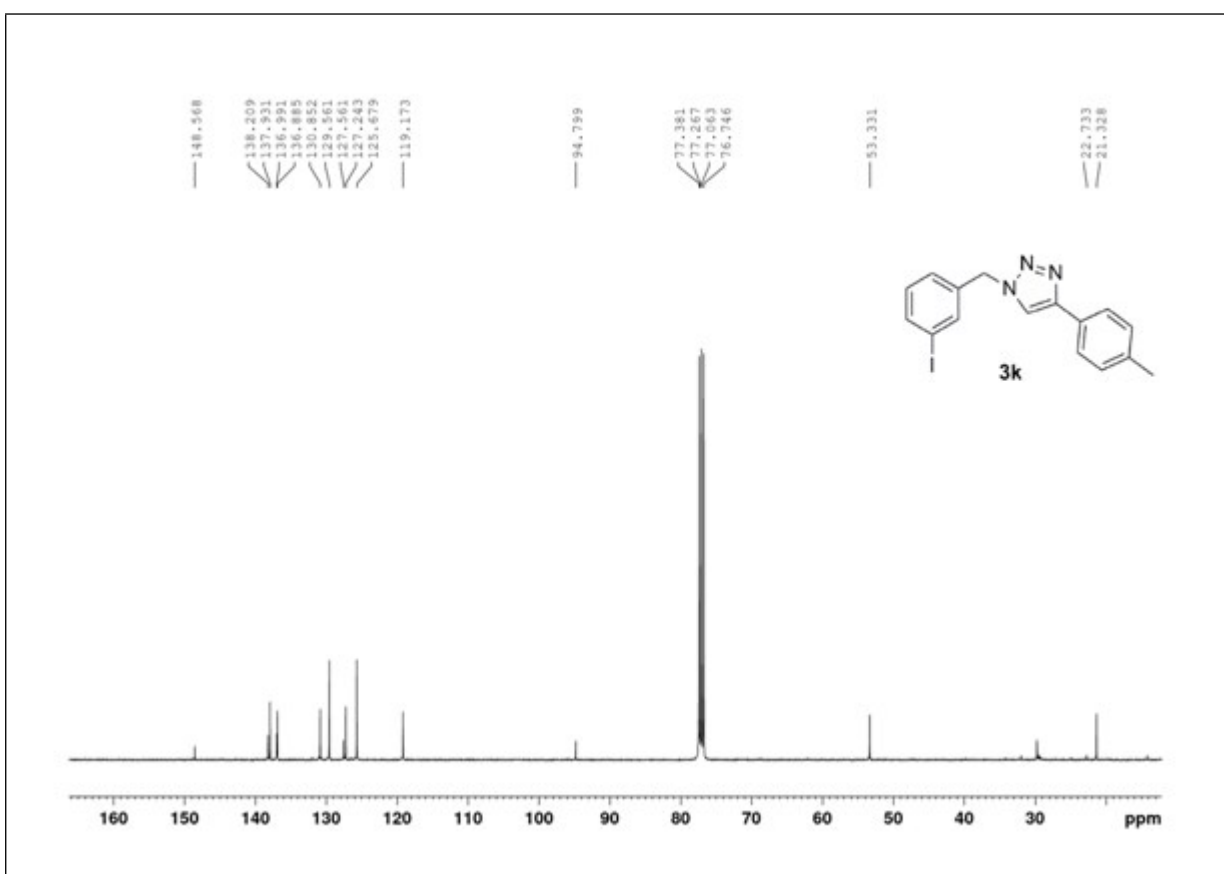

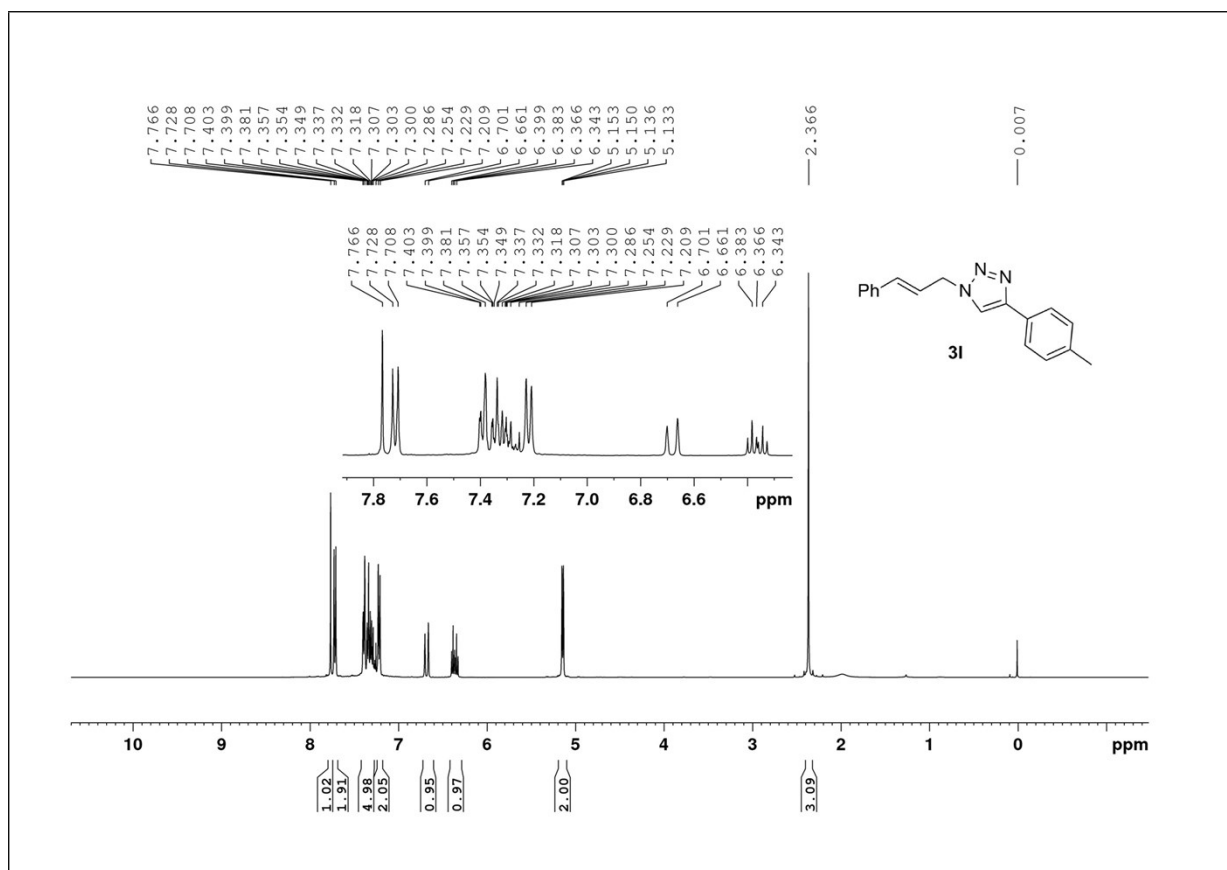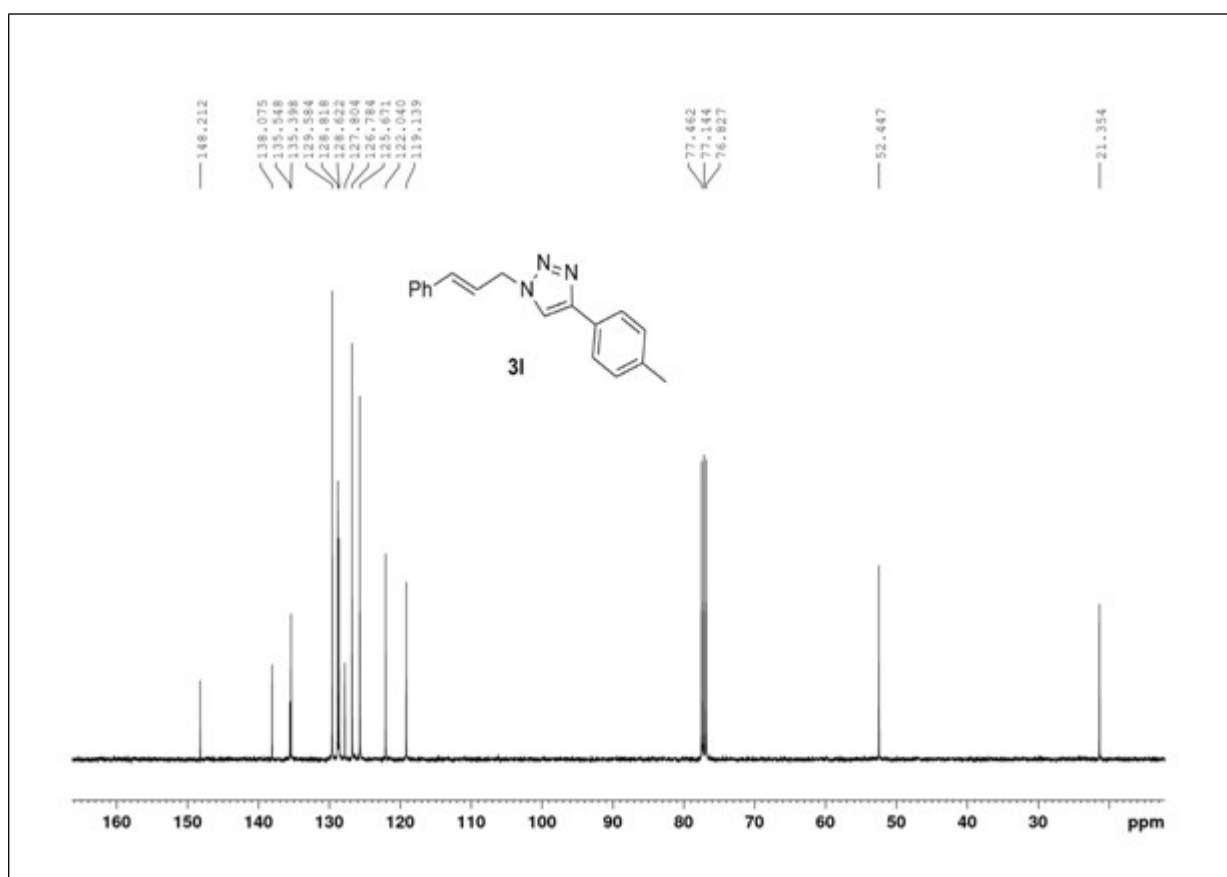

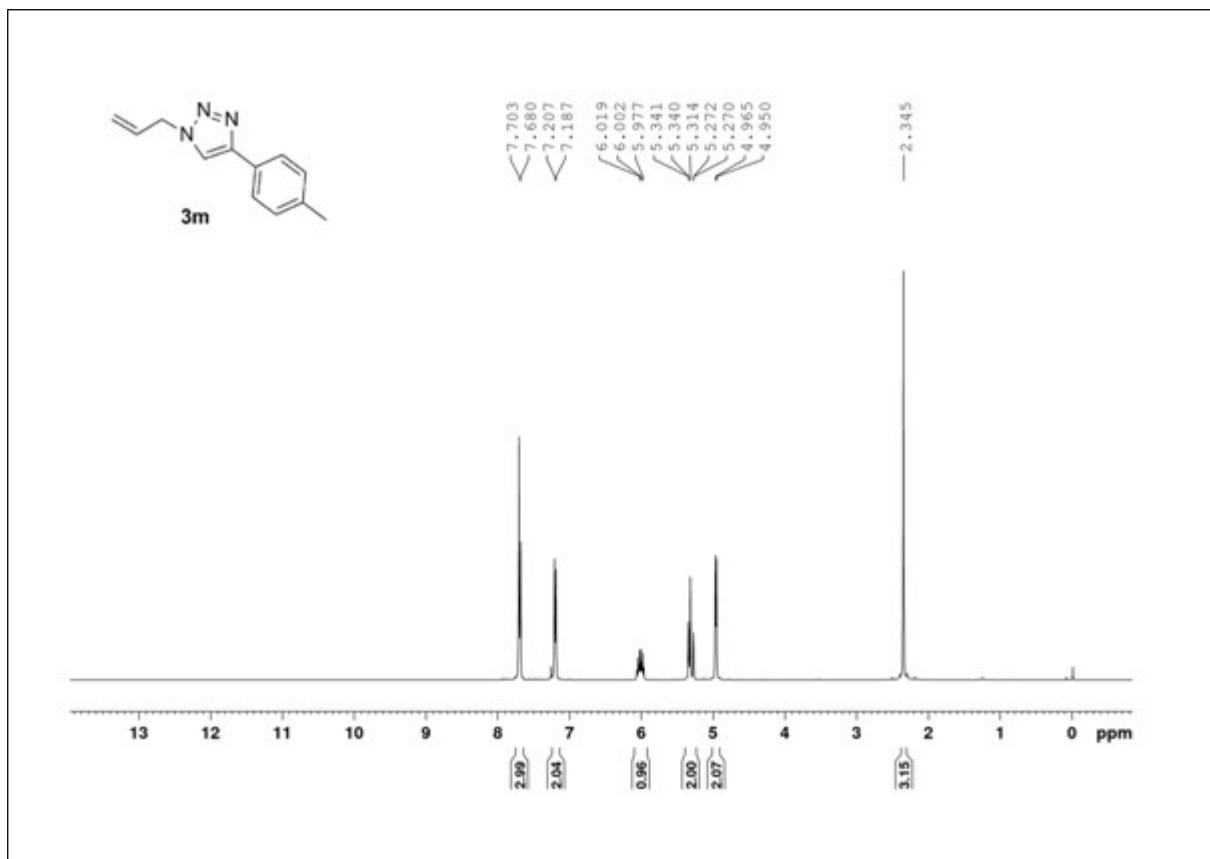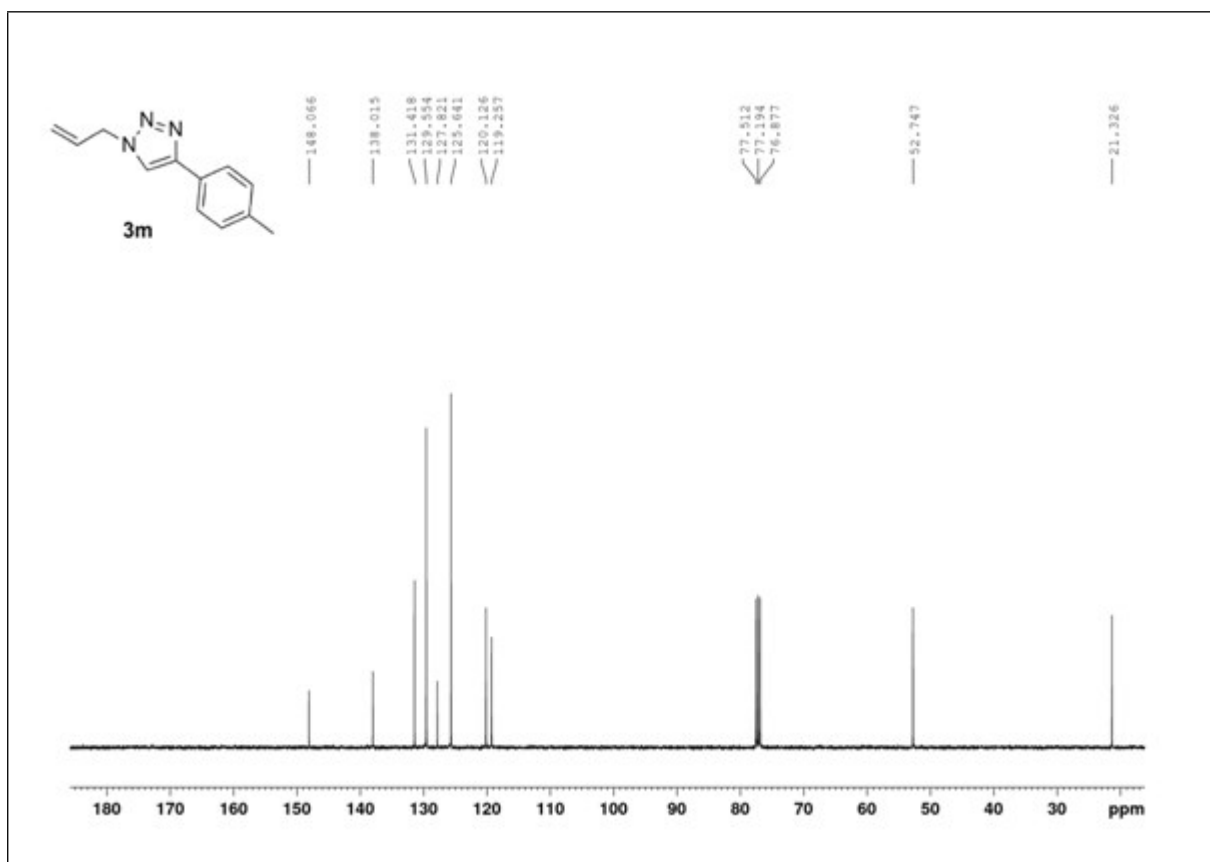

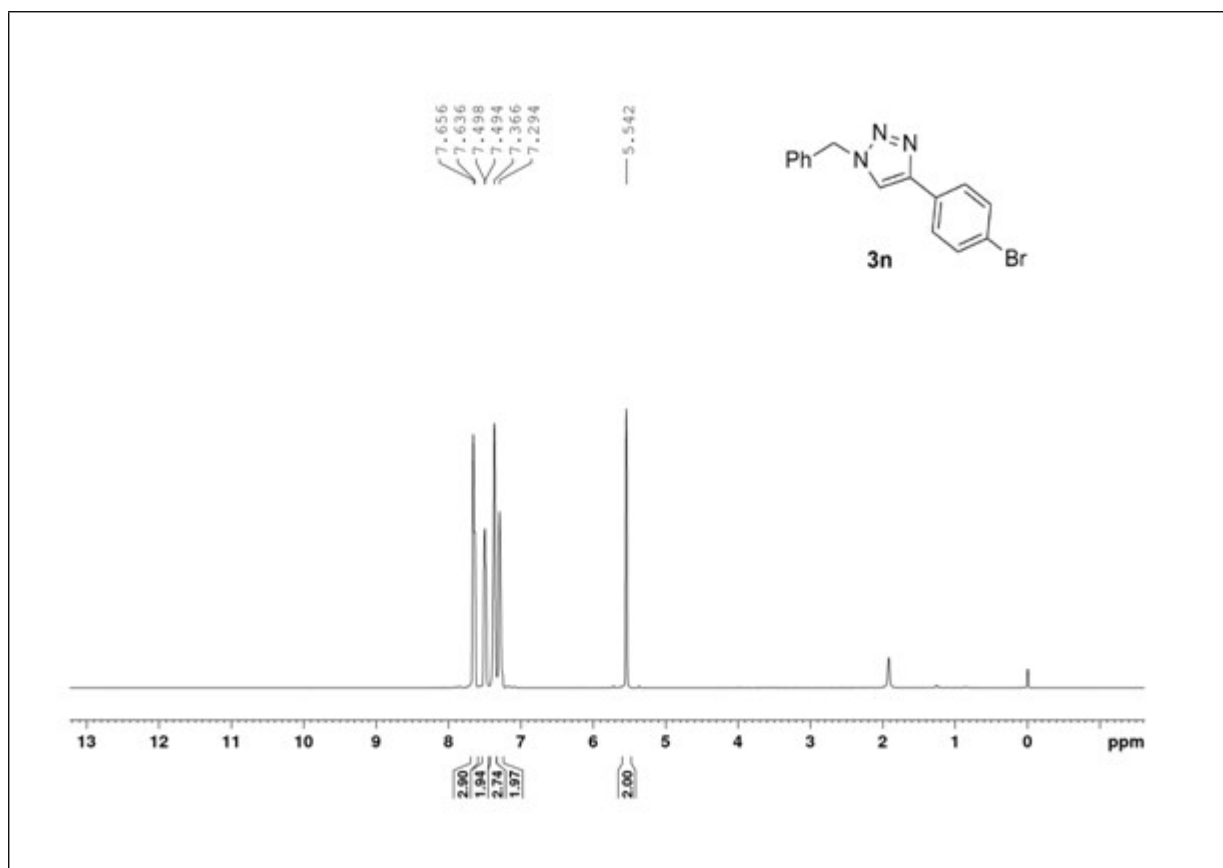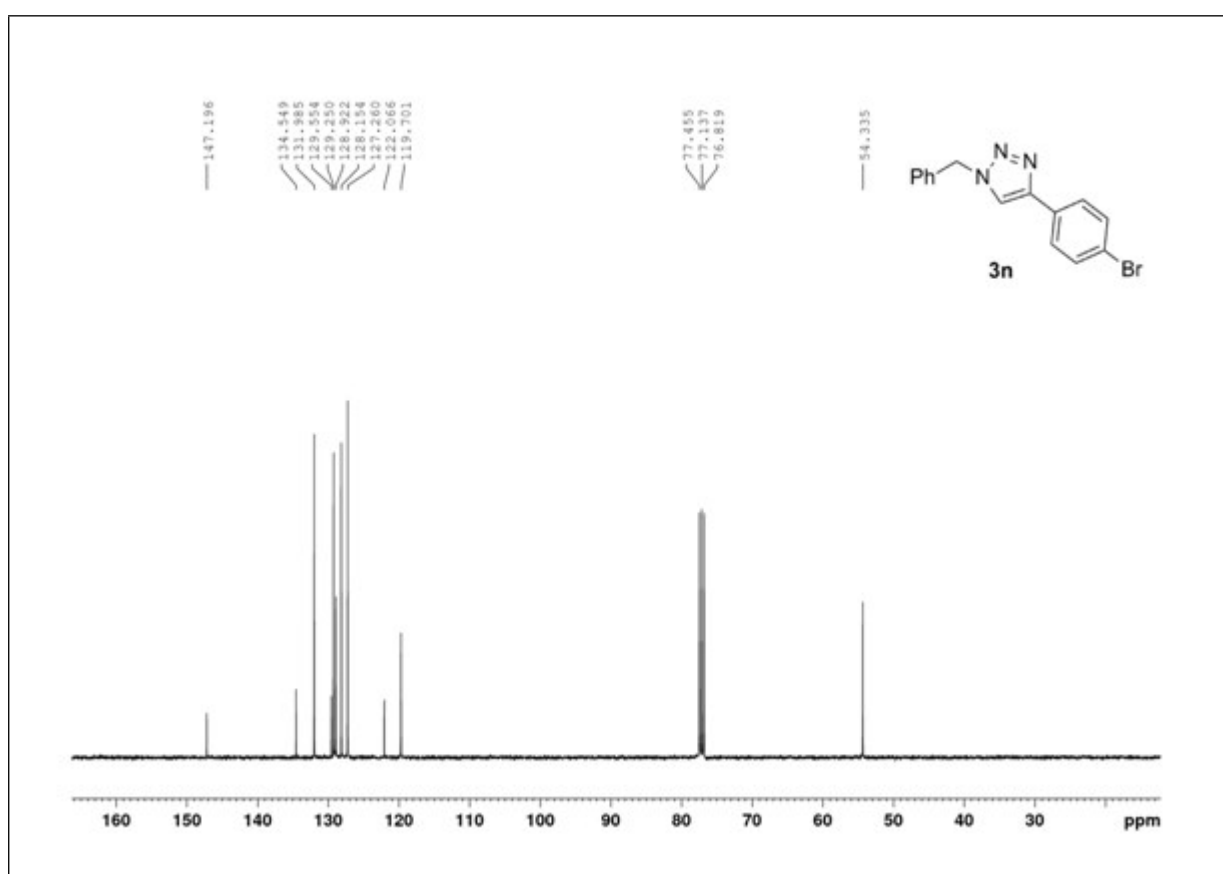

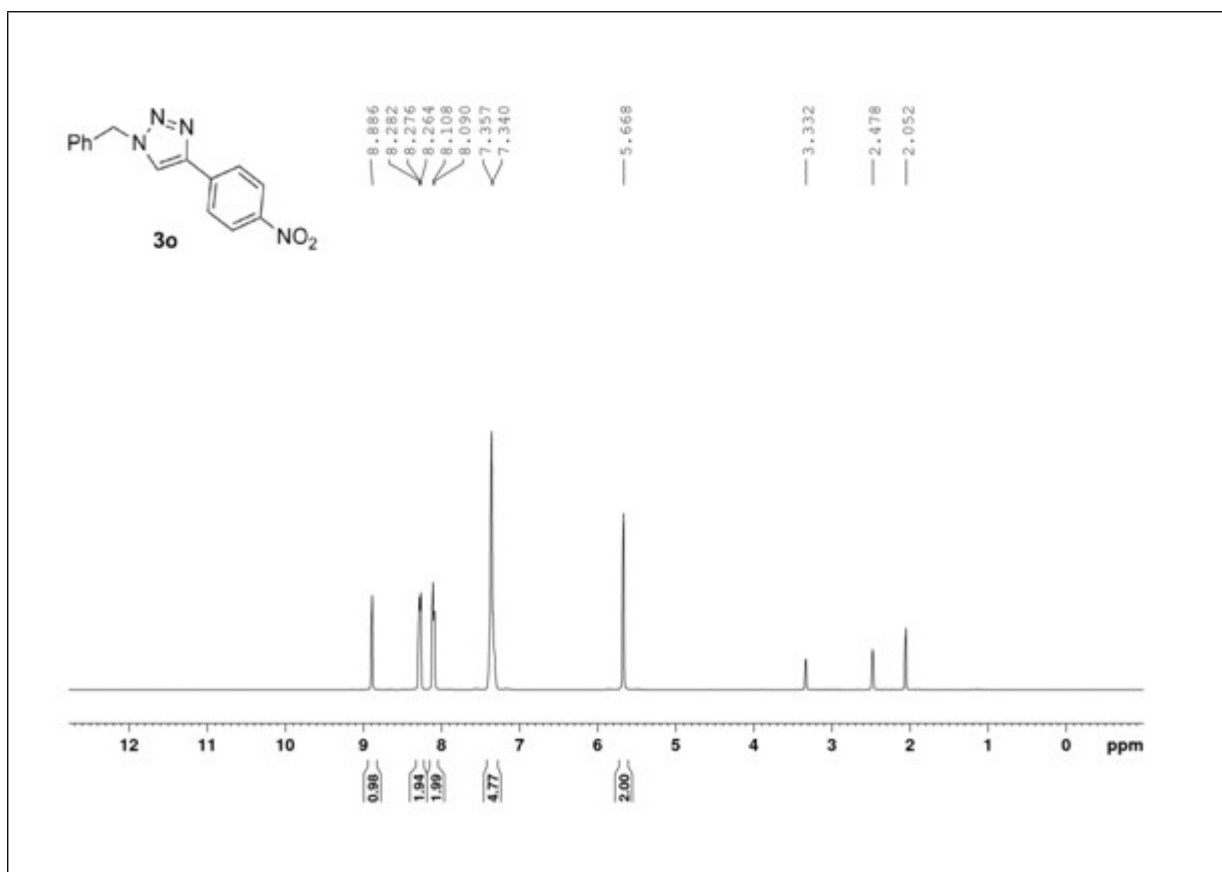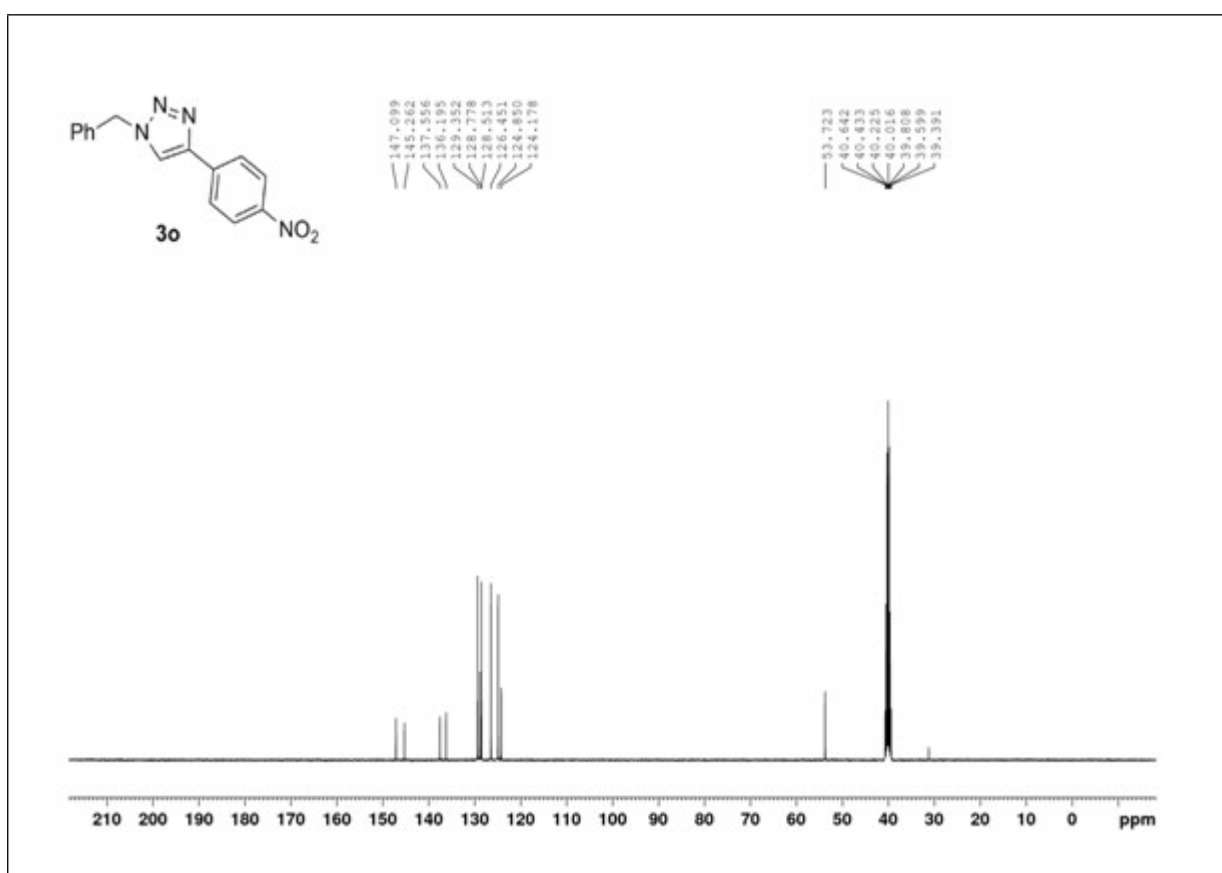

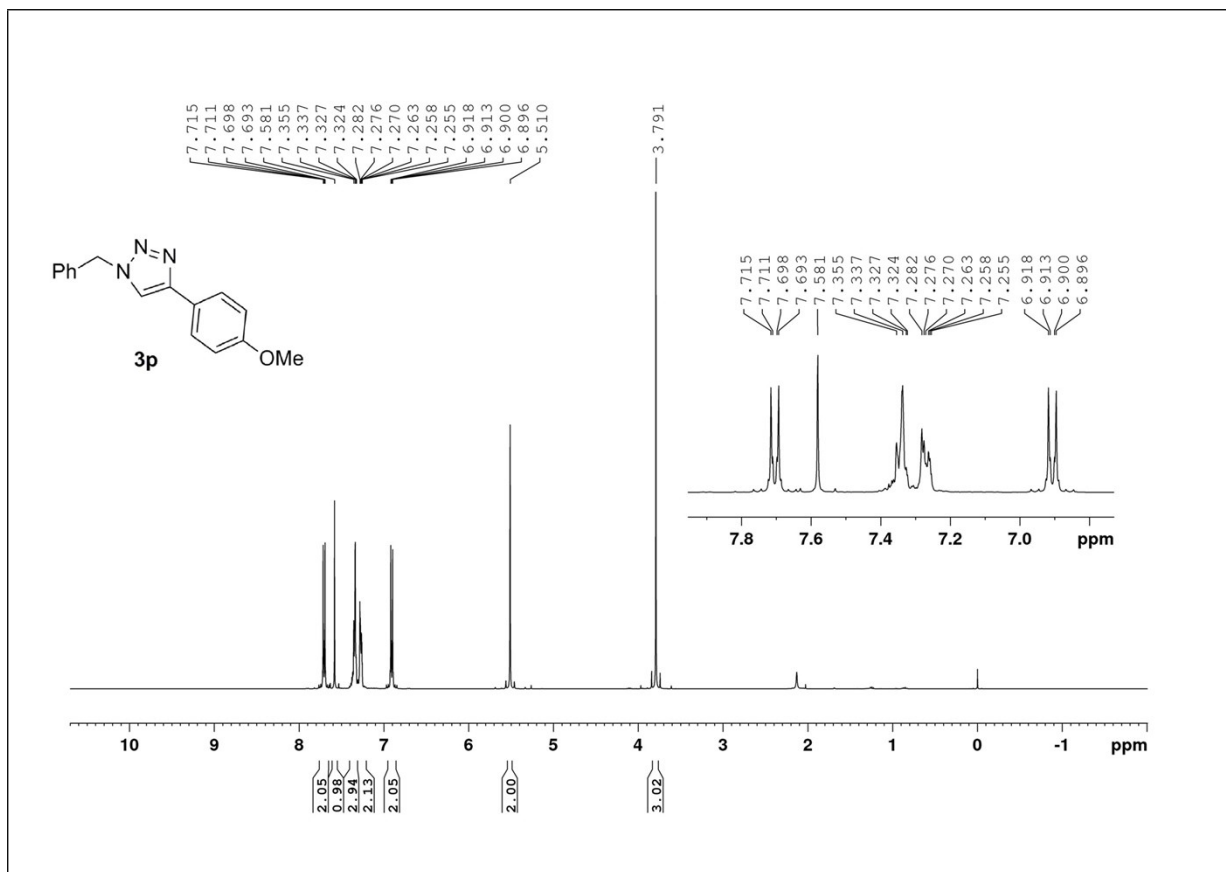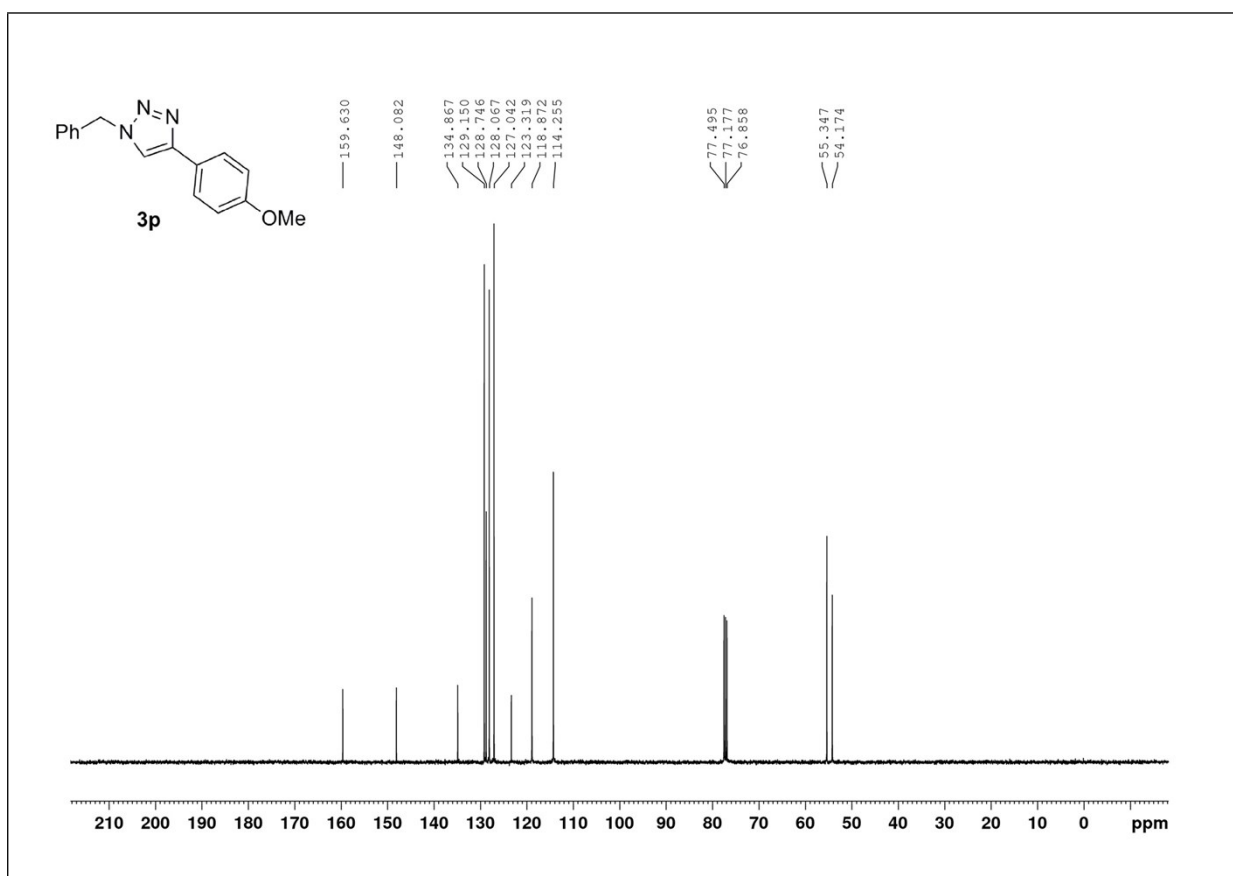

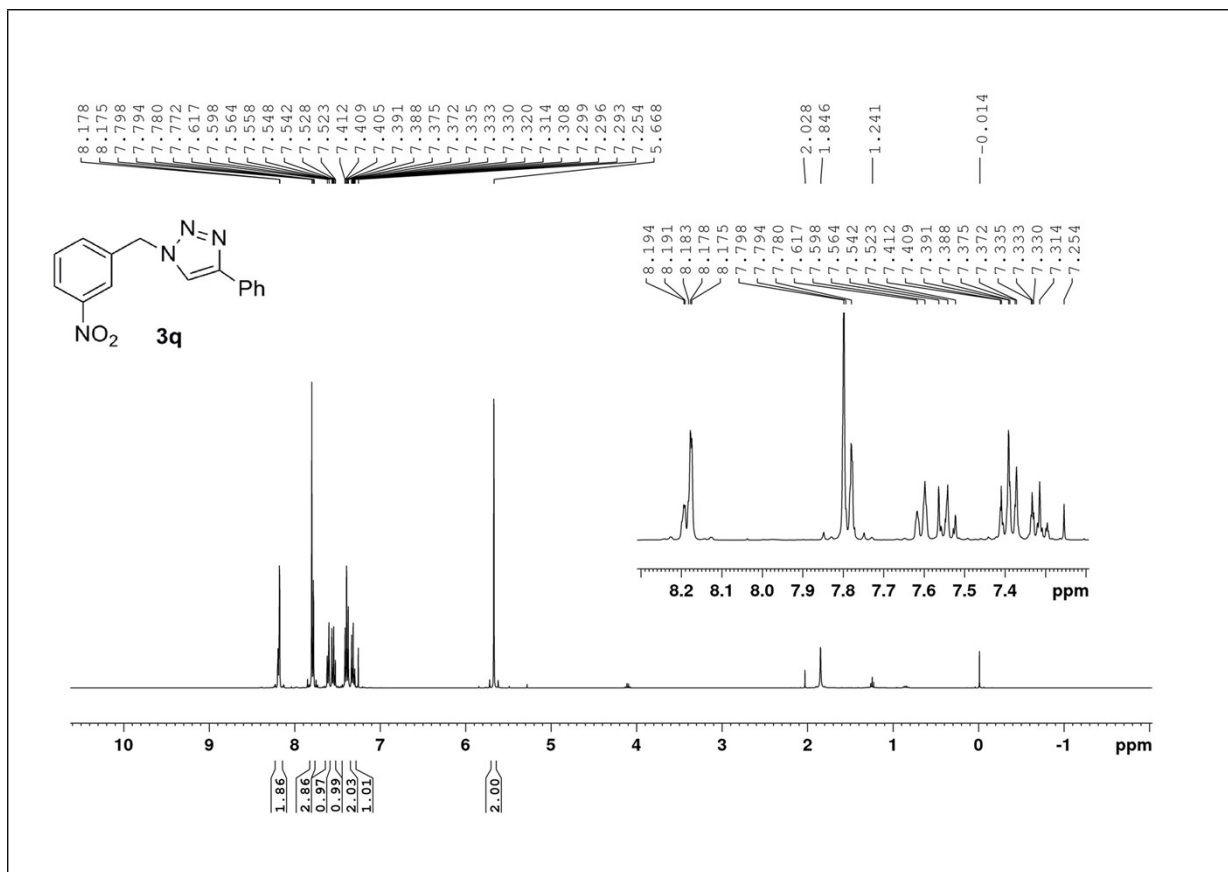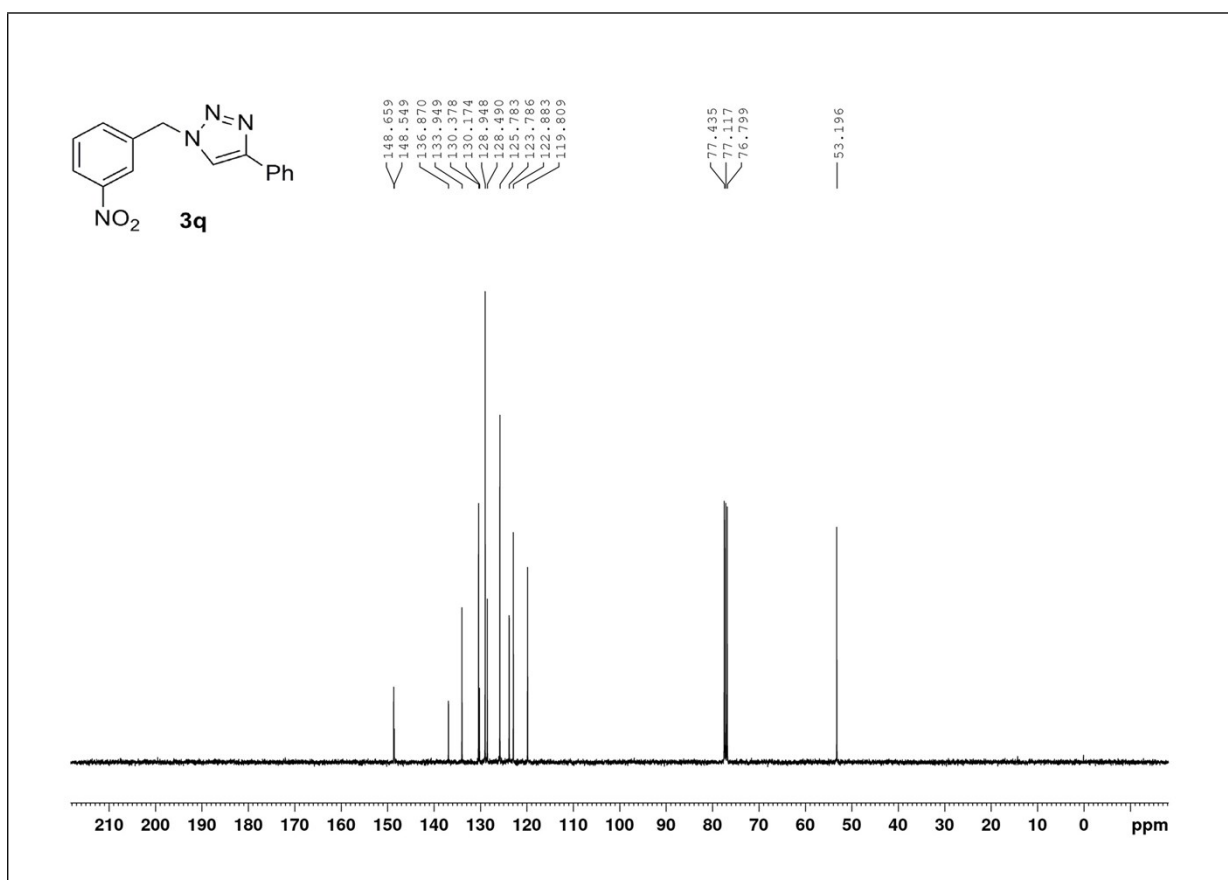

Supplement: d1ma00143d1.pdf [file d1ma00143d1.pdf]
